# Supplementary material for: Aberrant phosphorylation inactivates Numb in breast cancer causing expansion of the stem cell pool
Source: PubMed Central journal article supplement — J Cell Biol. 2022 Oct 6;221(12):e202112001. doi: 10.1083/jcb.202112001 (PMC9545709; doi:10.1083/jcb.202112001), 2022-10-06

**Figure 3E**

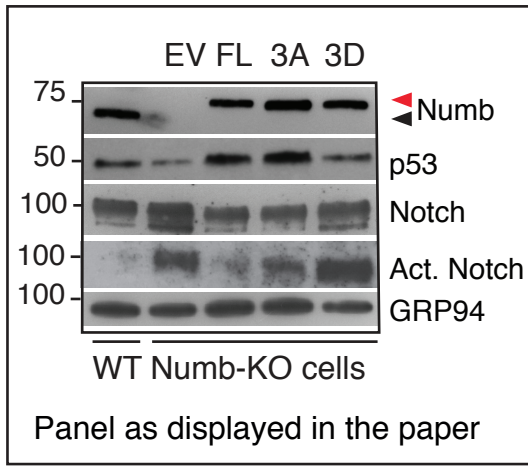

Lysates were run on 3 gels (gel 1, gel 2, gel 3); IBs were as follows:

Gel 1: anti-Numb; then stripped and re-blotted with anti-vinculin and anti-GRP94 (together). Only the GRP94 staining is shown in the panel.  
 Gel 2: anti-Act. Notch, then stripped and re-blotted with anti-Notch  
 Gel 3: anti-p53

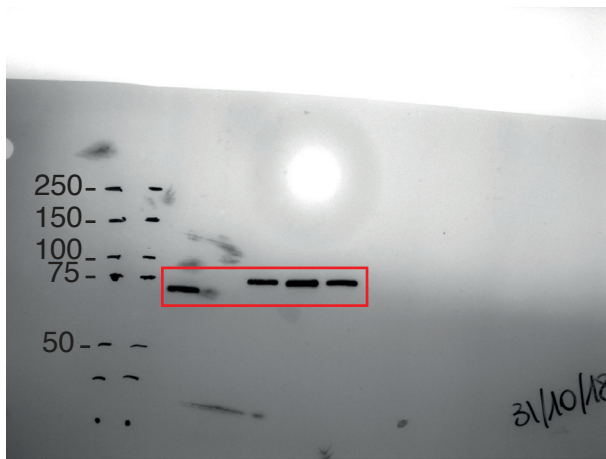

Numb (Mouse)  
(Gel 1)

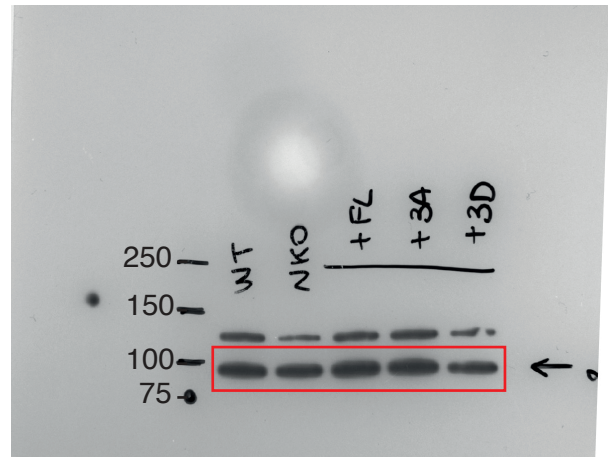

GRP94(Rat)  
(Gel 1, re-blot)

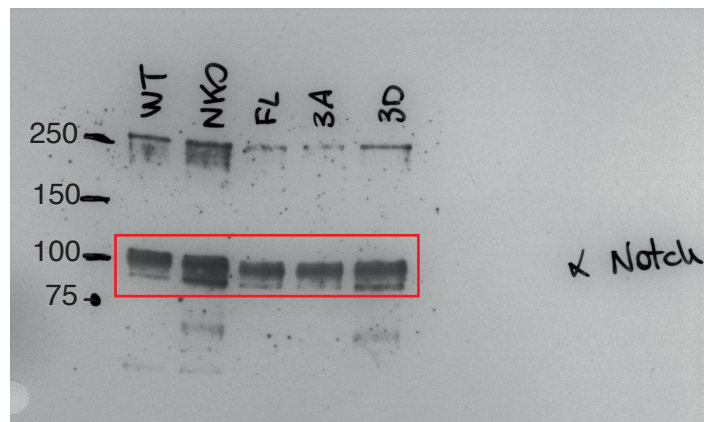

Notch (Rat)  
(Gel 2, re-blot)

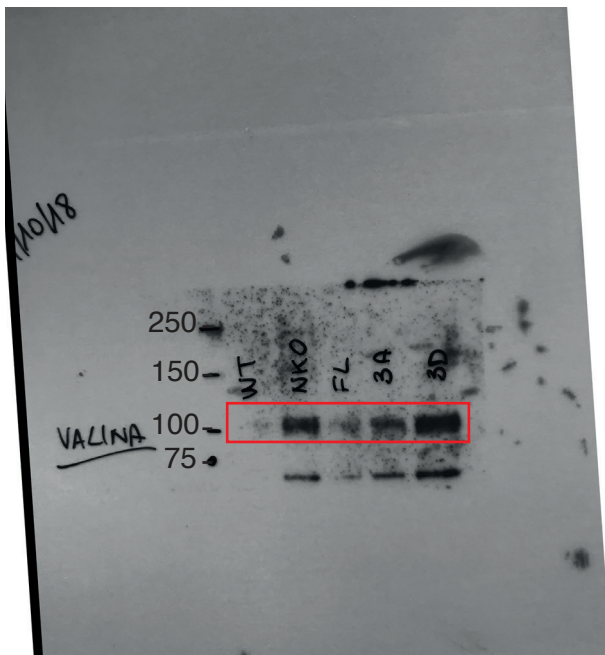

Act. Notch (Rabbit)  
(Gel 2)

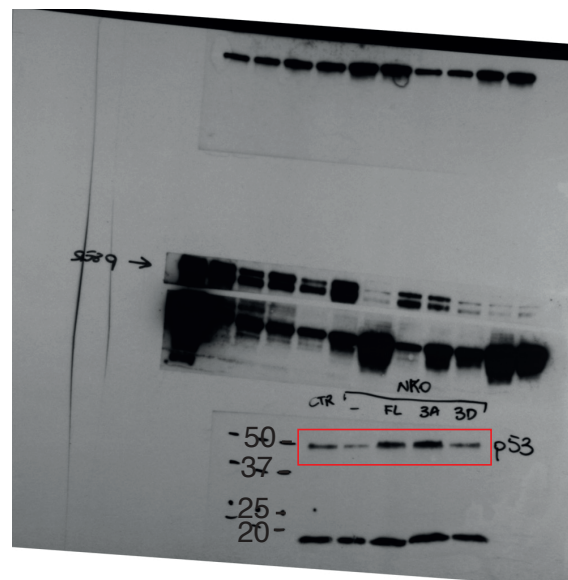

p53 (Mouse)  
(Gel 3)

Figure 3F

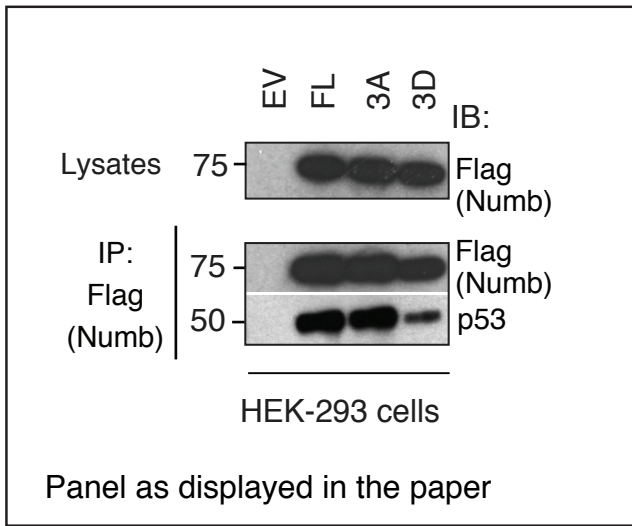

Lysates and IPs were run on a single gel. The membrane was cut to isolate regions of interest. The lower part was IB with anti-p53 (the upper part was IB with anti-eps15, which is not shown in the panel). The lower part of the membrane was then re-blotted (without stripping) with anti-FLAG (to detect Numb, the p53 signal is still visible on the membrane underneath Numb)

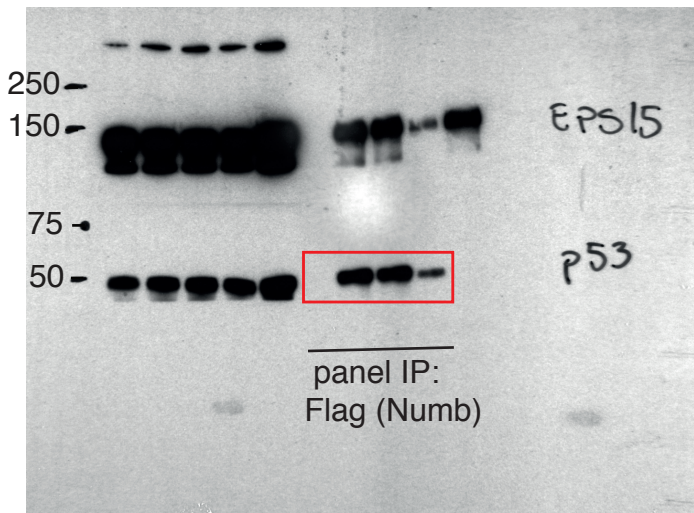

IB p53 (Goat)  
Lower panel IP

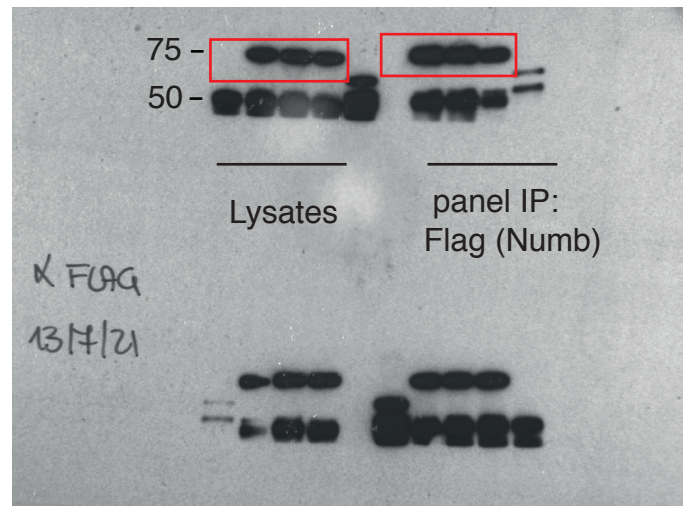

IB Flag (Numb)  
(Rabbit)

**Figure 3G**

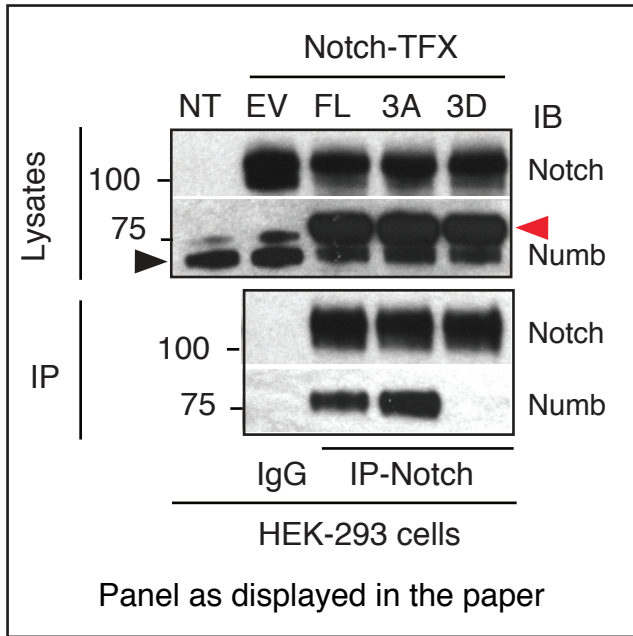

Lysates were run on a single gel.

The membrane was IB with anti-Numb, then stripped and reblotted with anti-Notch

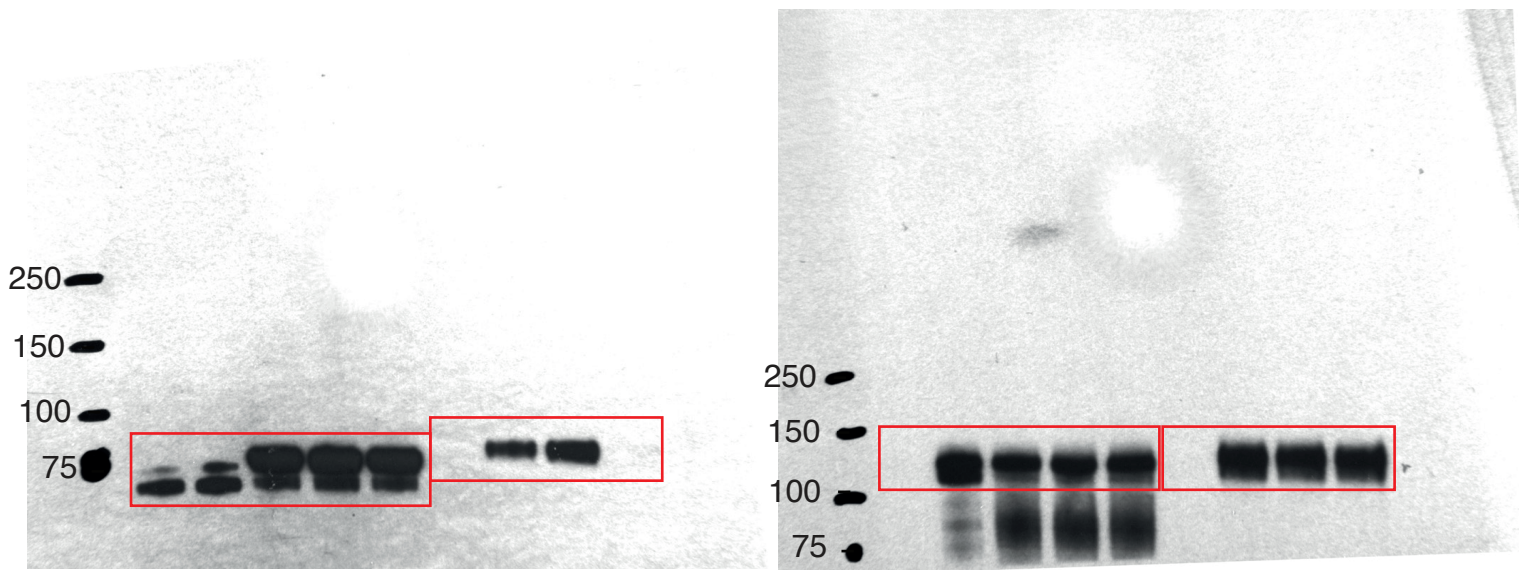

Numb (Mouse)  
Left box: lysates  
Right box: IP

Notch (Rat) (re-blot)  
Left box: lysates  
Right box: IP

**Figure 3H**

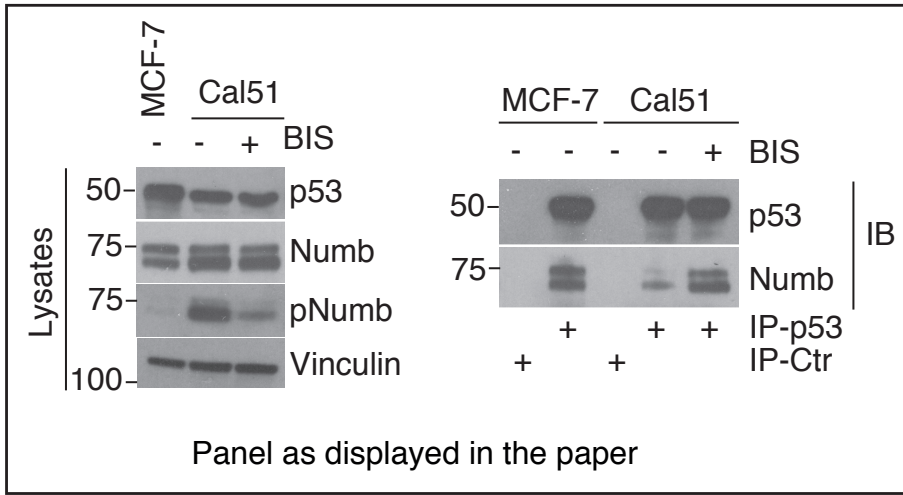

Lysates were run on 3 gels (gel 1, gel 2, gel 3); IBs were as follows:

Gel 1: anti-p53.

For gel 1, we display 2 different exposures, one used for the panel "lysates" and one for the panel "IP".

Gel 2: anti-Numb (left box, lysates; right box, IP).

Gel 3: anti-pNUMB and then re-blotted with anti-Vinculin

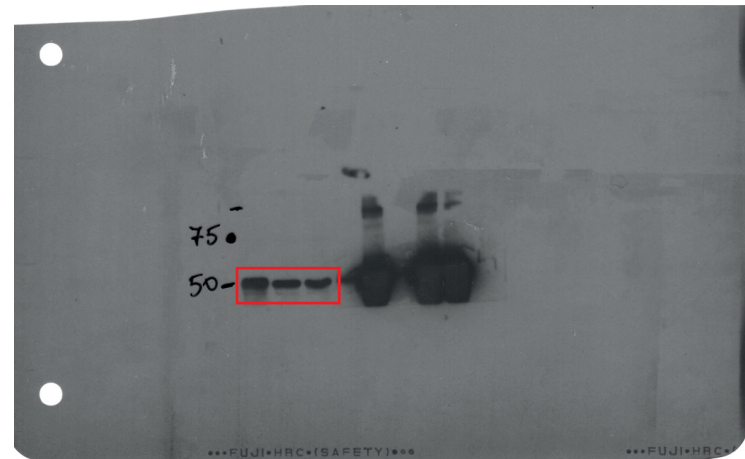

p53 (Goat) (Gel 1). High exp (panel "lysates")

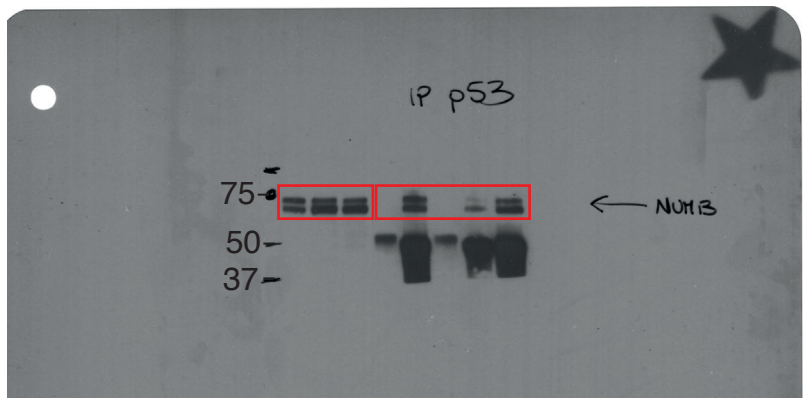

Numb (Mouse) (Gel 2)  
(left box, lysates; right box, IP).

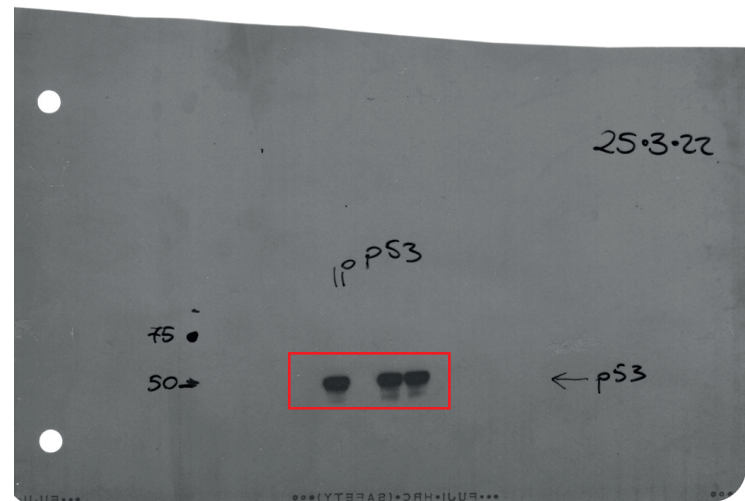

p53 (Goat) (Gel 1). Low exp (panel "IP")

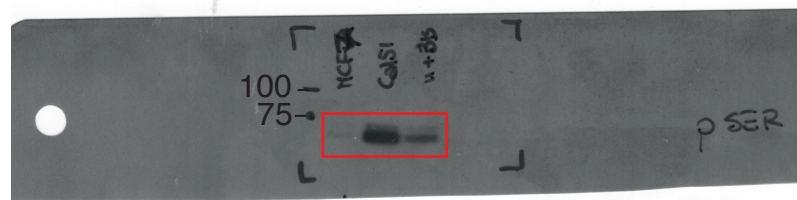

pNumb (Rabbit) (Gel 3)

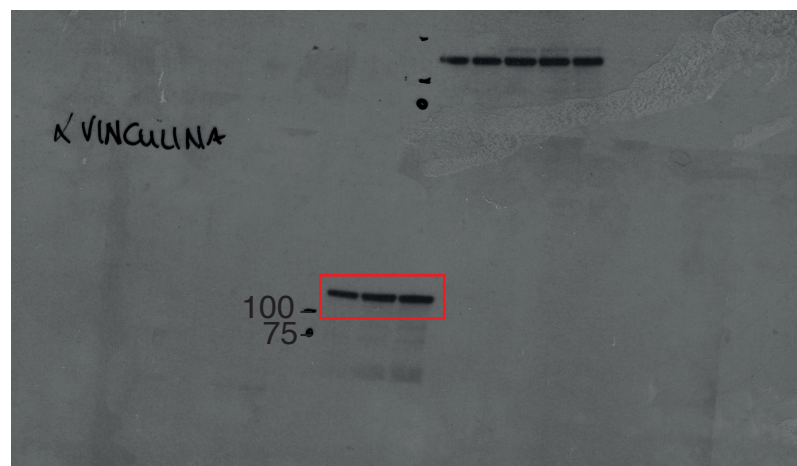

Vinculin (Mouse) (Re-blot Gel 3)

**Figure 3I**

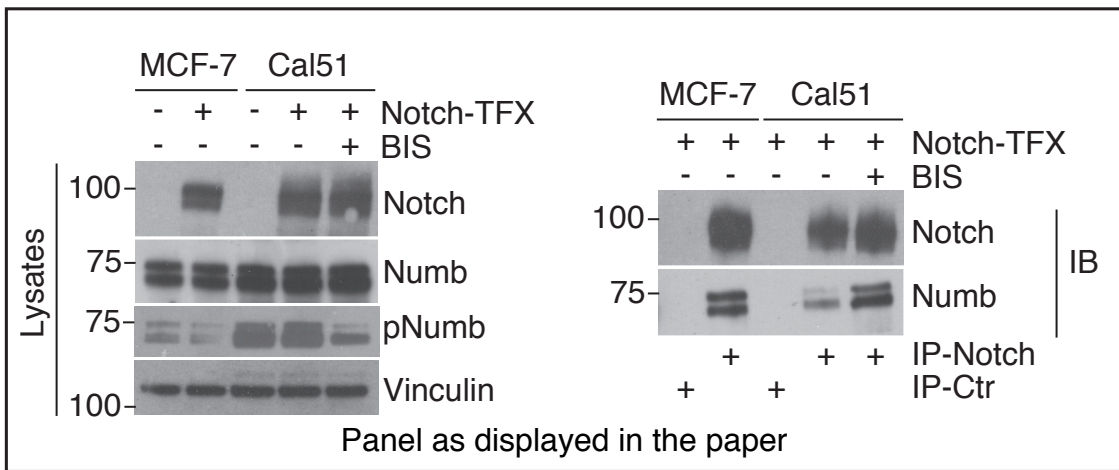

Lysates were run on 3 gels (gel 1, gel 2, gel 3); IBs were as follows:

Gel 1: anti-Notch (left box, lysates; right box, IP).

Gel 2: anti-Numb.

For gel 2, we display 2 different exposures, one used for the panel "lysate" and one for the panel "IP".

Gel 3: anti-pNumb and then re-blotted with anti-Vinculin

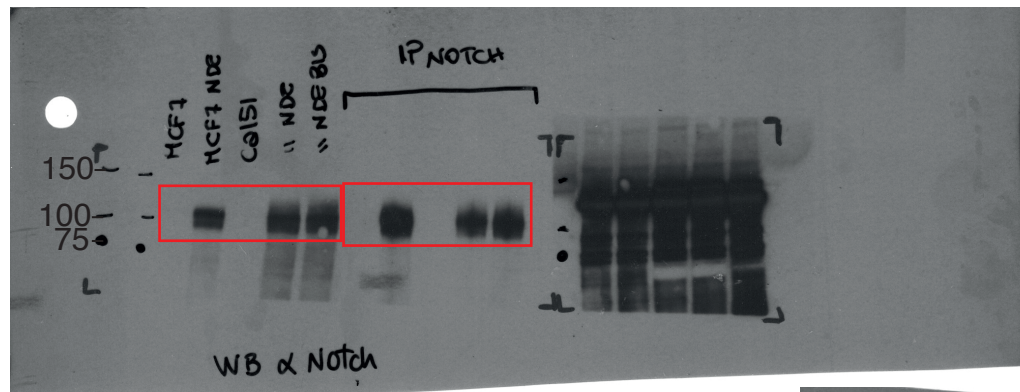

Notch (Rat) (Gel 1)  
(left box, lysates; right box, IP)

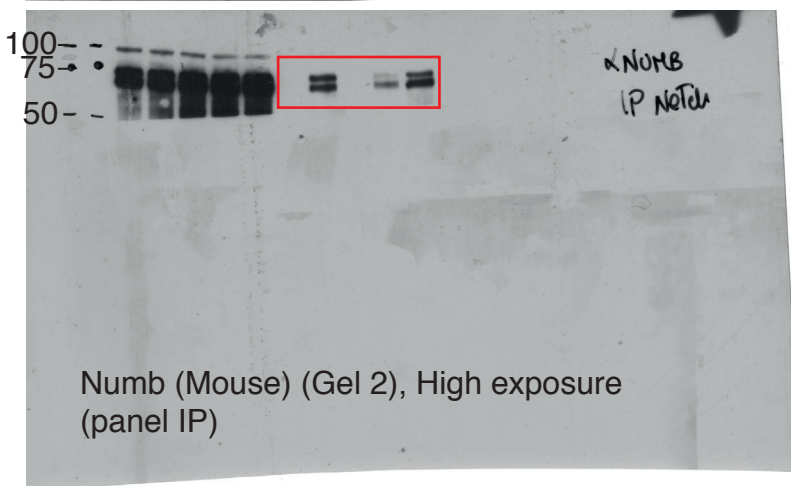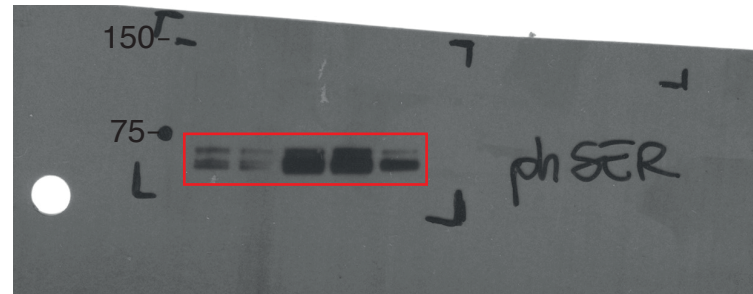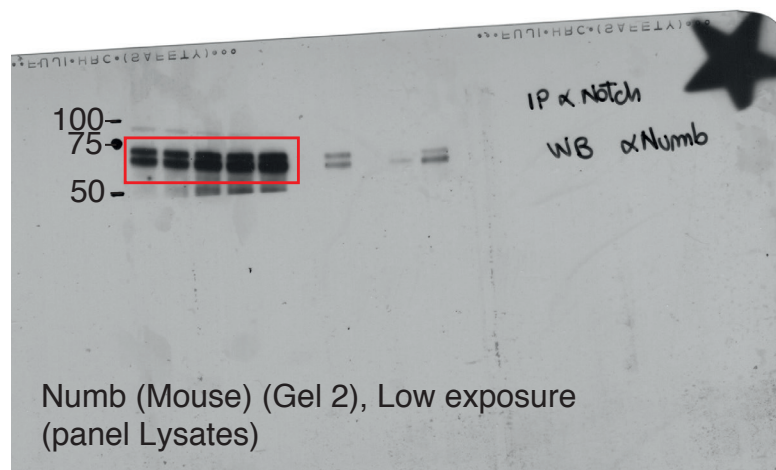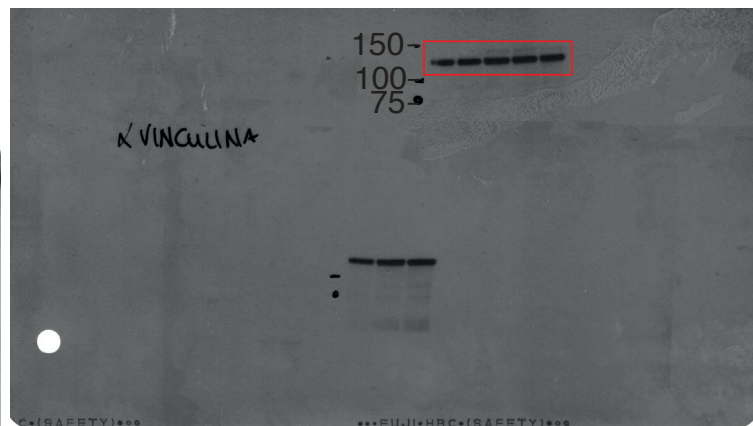

Supplement: JCB_202112001_SourceDataF3.pdf [file JCB_202112001_SourceDataF3.pdf]
