# Supplementary material for: Aberrant phosphorylation inactivates Numb in breast cancer causing expansion of the stem cell pool
Source: PubMed Central journal article supplement — J Cell Biol. 2022 Oct 6;221(12):e202112001. doi: 10.1083/jcb.202112001 (PMC9545709; doi:10.1083/jcb.202112001), 2022-10-06

**Figure 5A**

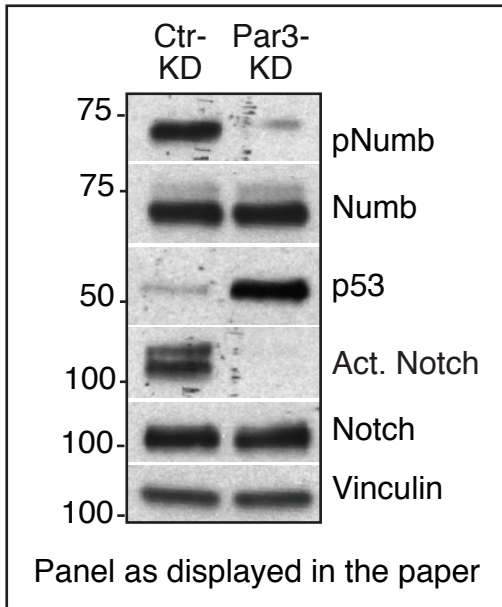

Lysates were run on 2 gels (gel 1, gel 2); IBs were as follows:

Gel 1: anti-Act. Notch (upper part of the membrane); anti-pNumb (middle part of the membrane); anti-p53 (lower part of the membrane)  
 For gel 1, we display 2 different exposures, one used to show Act. Notch and pNumb, the other to show p53.

Gel 2: anti-Notch (upper part of the membrane), then re-blotted with anti Vinculin; anti-Numb (lower part of the membrane).

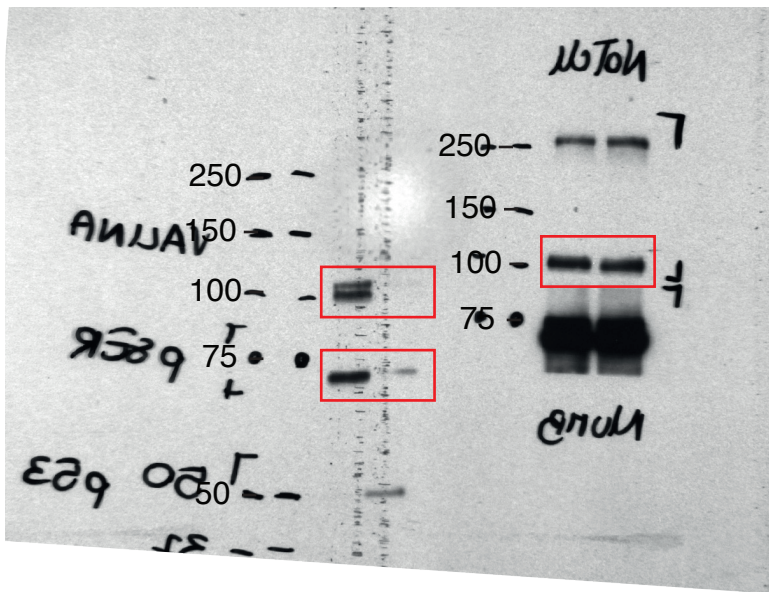

Act. Notch (Rabbit), upper box;  
 pNumb (Rabbit), lower box;  
 (Gel 1, short exposure)

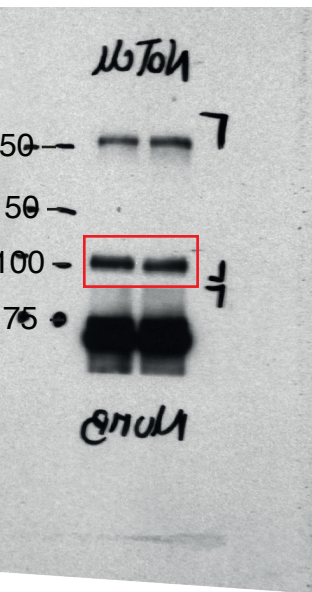

Notch (Rat);  
 (Gel 2, upper part of membrane)

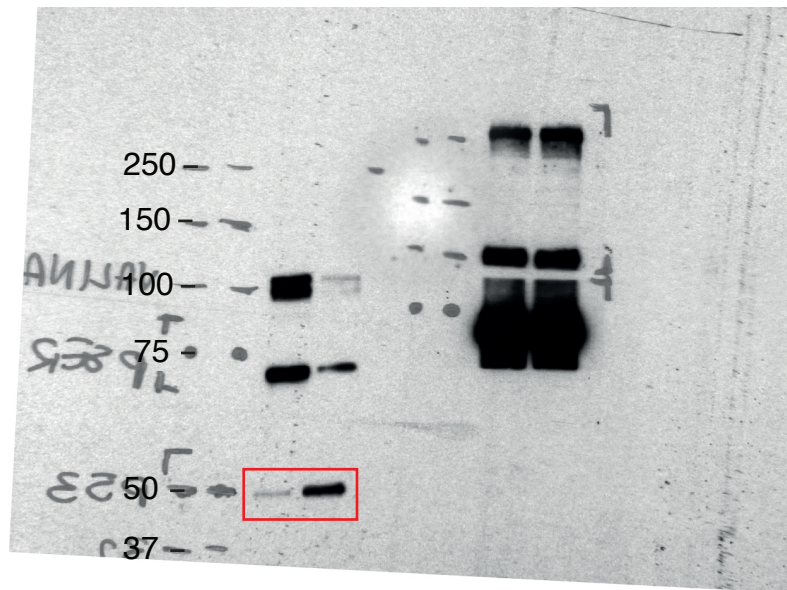

p53 (Mouse);  
 (Gel 1, long exposure)

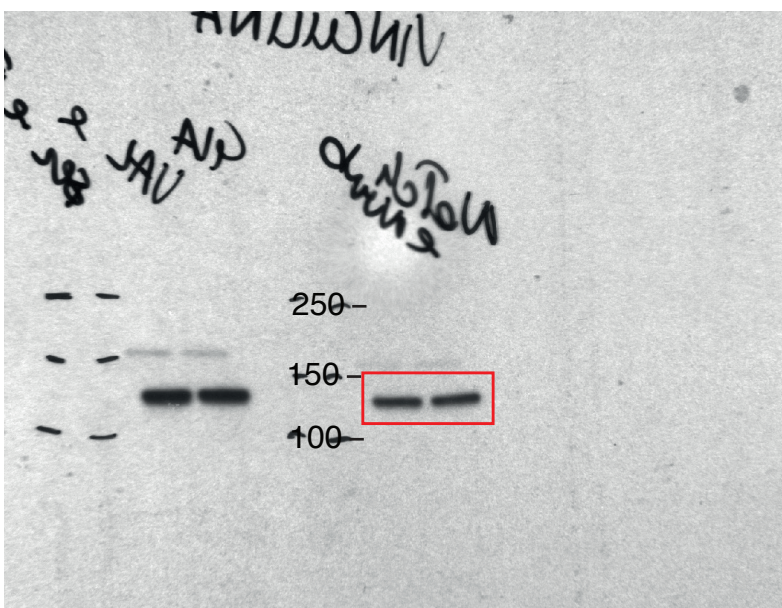

Vinculin (Mouse);  
 (Re-blot Gel 2, upper part of membrane)

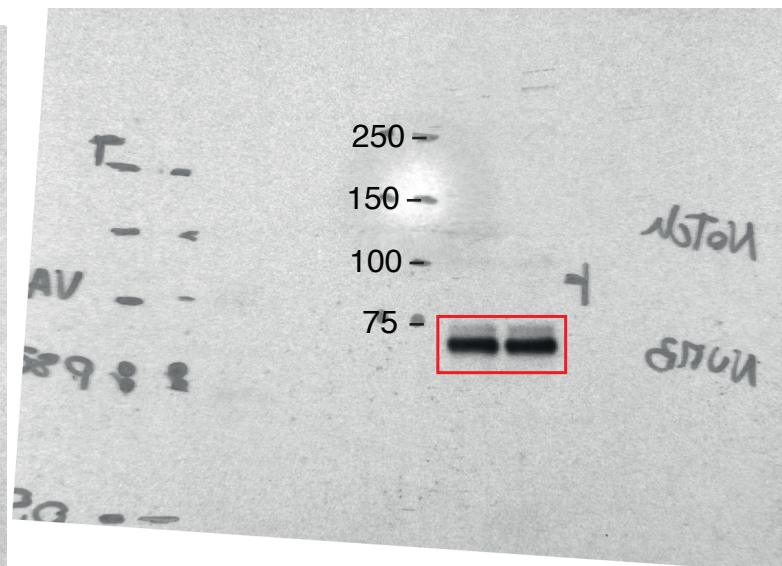

Numb (Mouse);  
 (Gel 2, lower part of membrane)

**Figure 5B**

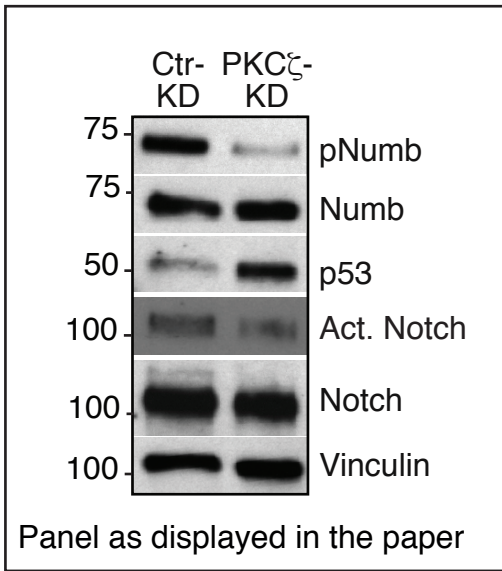

Lysates were run on 3 gels (gel 1, gel 2, gel 3); IBs were as follows:

Gel 1: anti-pNumb, then stripped and re-blotted with anti-Vinculin.

Gel 2: anti-Numb

Gel 3: Upper part of membrane: anti-Act. Notch, then stripped and re-blotted with anti-Notch. Lower part of membrane, anti-p53.

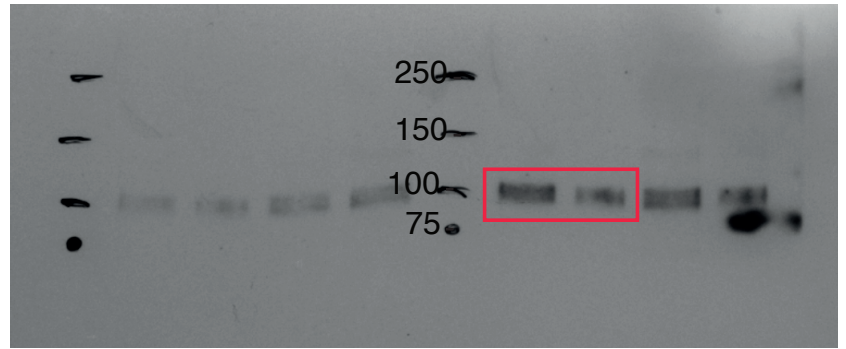

Act. Notch (Rabbit) (Gel 3, upper part of membrane)

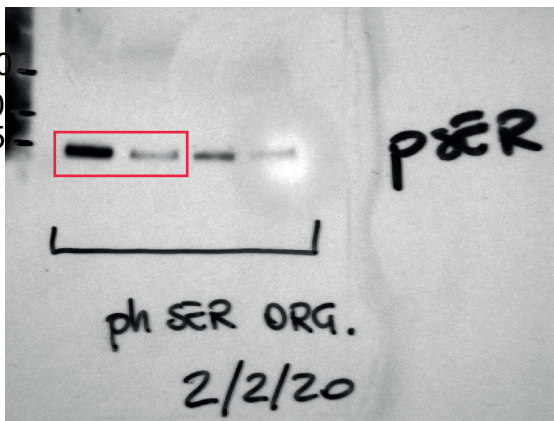

pNumb (Rabbit) (Gel 1)

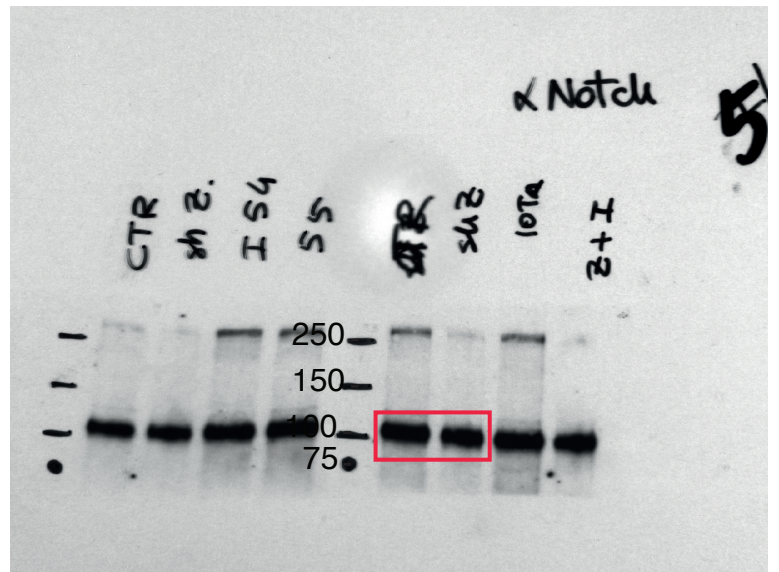

Notch (Rat) (Re-blot Gel 3, upper part of membrane)

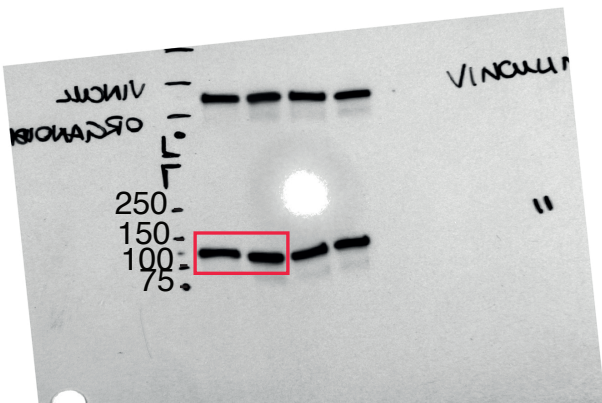

Vinculin (Mouse) (Re-blot Gel 1)

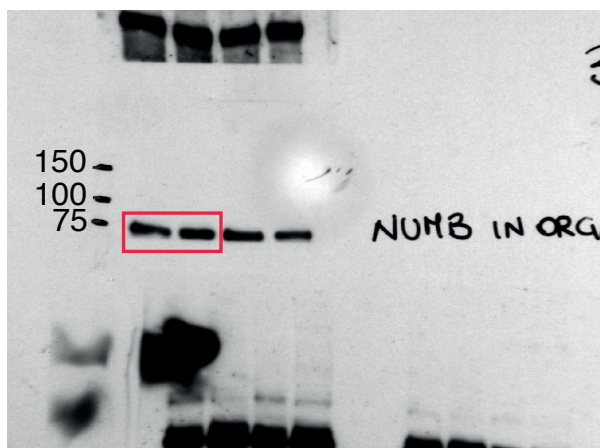

Numb (Mouse) (Gel 2)

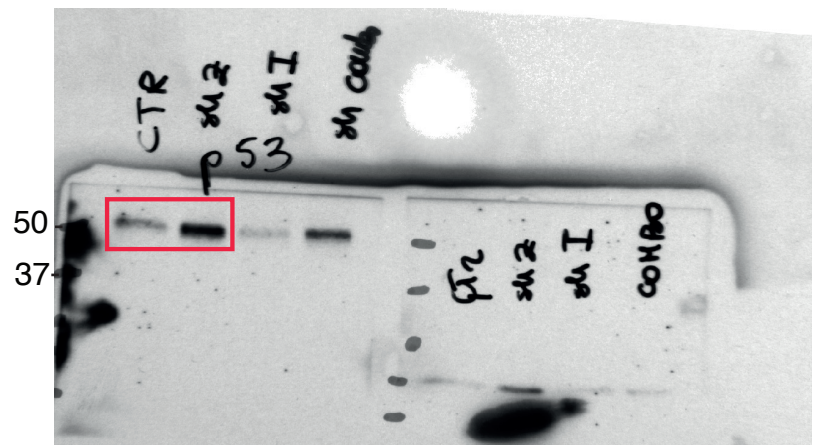

p53 (Mouse) (Re-blot Gel 3, lower part of membrane)

**Figure 5C**

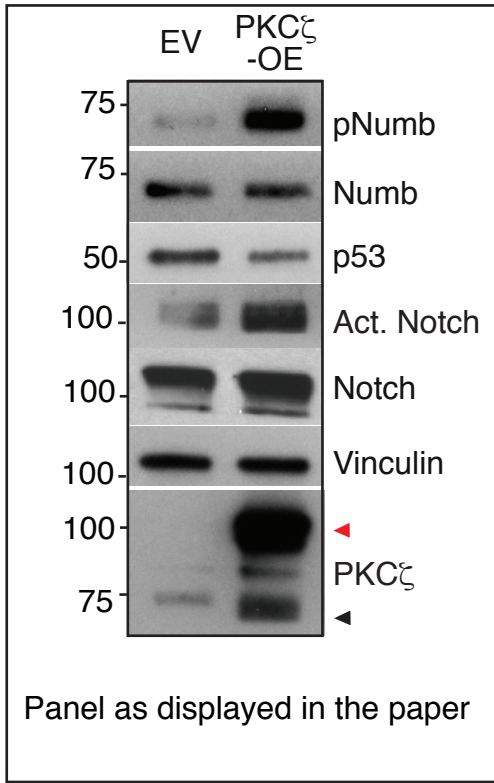

Lysates were run on 2 gels (gel 1, gel 2); IBs were as follows:  
 Gel 1:  
 Upper part of membrane: anti-PKC $\zeta$   
 Lower part of membrane anti-p53.  
 Upper part of membrane was stripped, further cut and reblotted:  
 - top: anti-Notch and then anti-Vinculin  
 - bottom: anti-pNumb  
 Gel 2: anti-Act. Notch (upper part of membrane); anti-Numb (lower part of membrane)

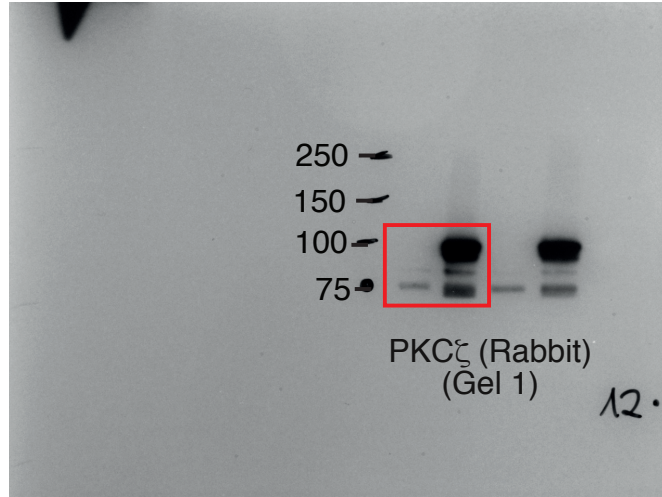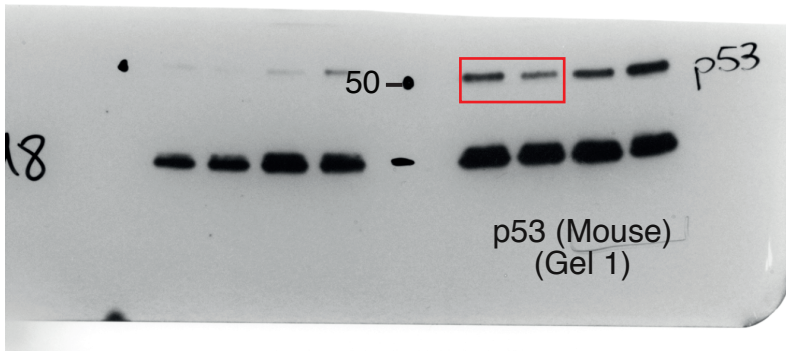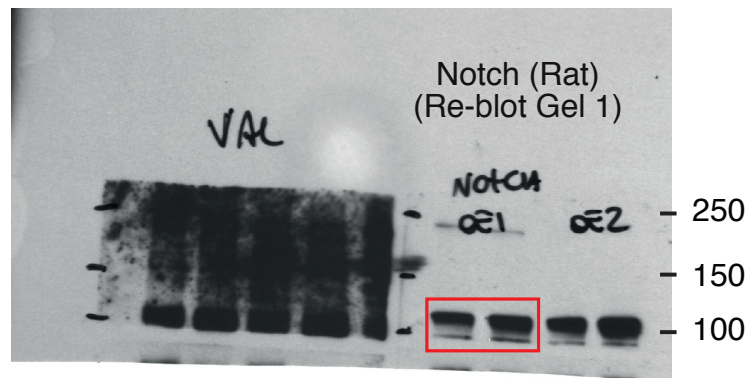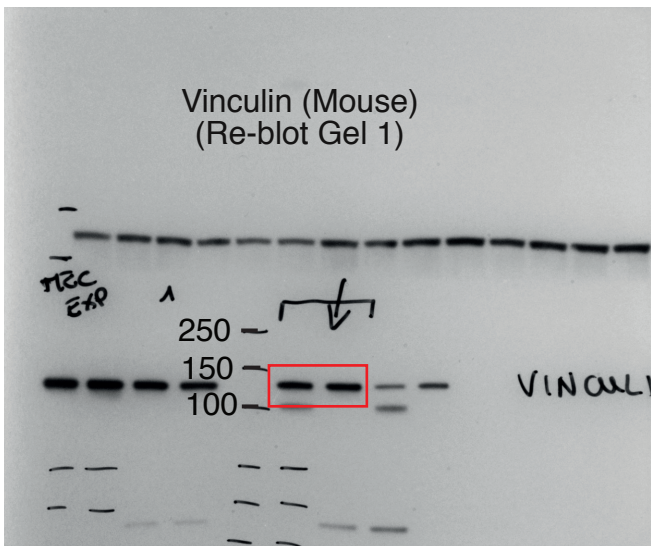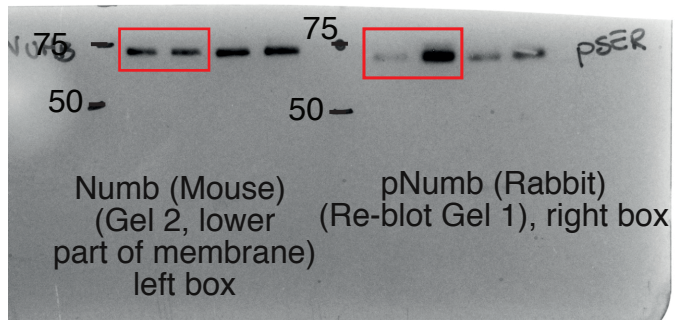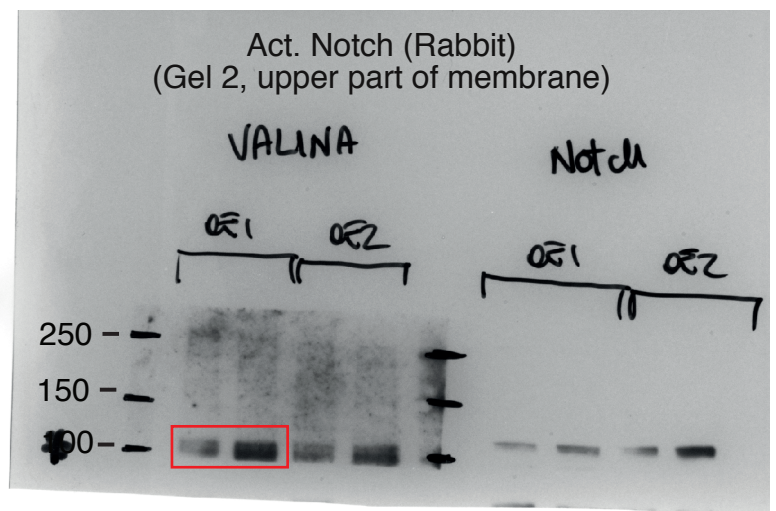

Supplement: JCB_202112001_SourceDataF5.pdf [file JCB_202112001_SourceDataF5.pdf]
