# Supplementary material for: Aberrant phosphorylation inactivates Numb in breast cancer causing expansion of the stem cell pool
Source: PubMed Central journal article supplement — J Cell Biol. 2022 Oct 6;221(12):e202112001. doi: 10.1083/jcb.202112001 (PMC9545709; doi:10.1083/jcb.202112001), 2022-10-06

Supplementary Figure 5C

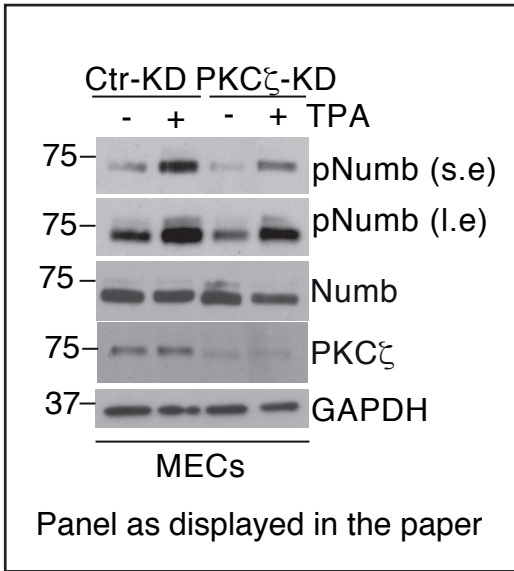

Lysates were run on 2 gels (gel 1, gel 2); IBs were as follows:  
 Gel 1: anti-pNumb (upper part of the membrane) two exposures are shown (s.e, short exp; l.e, long exp.). Anti GAPDH (lower part of the membrane).  
 Gel 2: anti-PKC $\zeta$ , then stripped and re-blotted with anti-Numb.

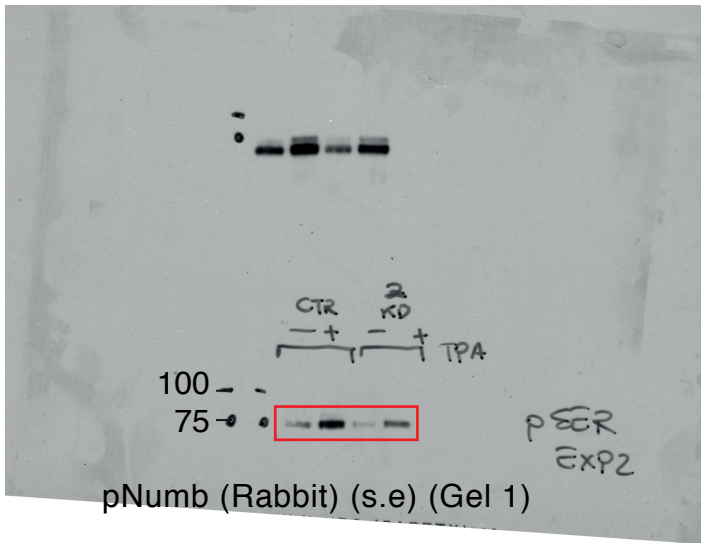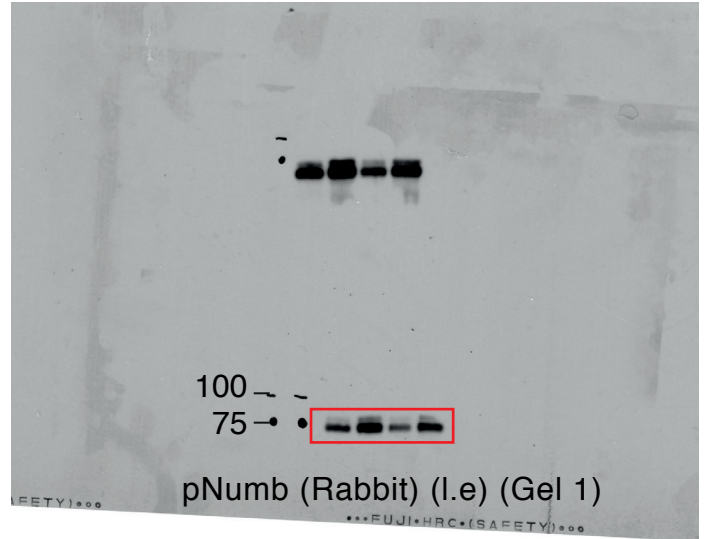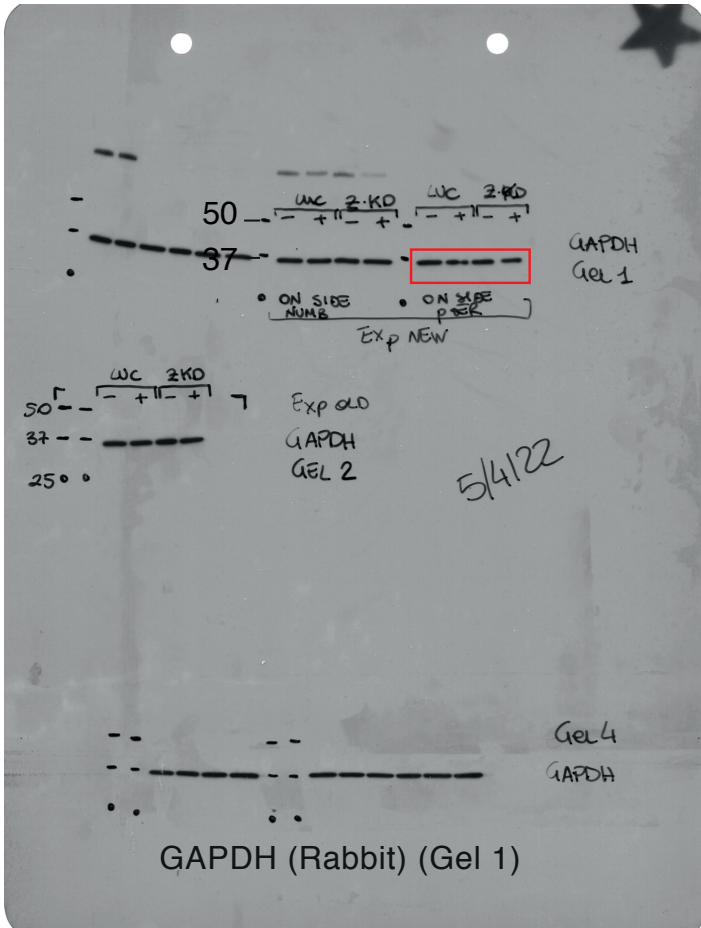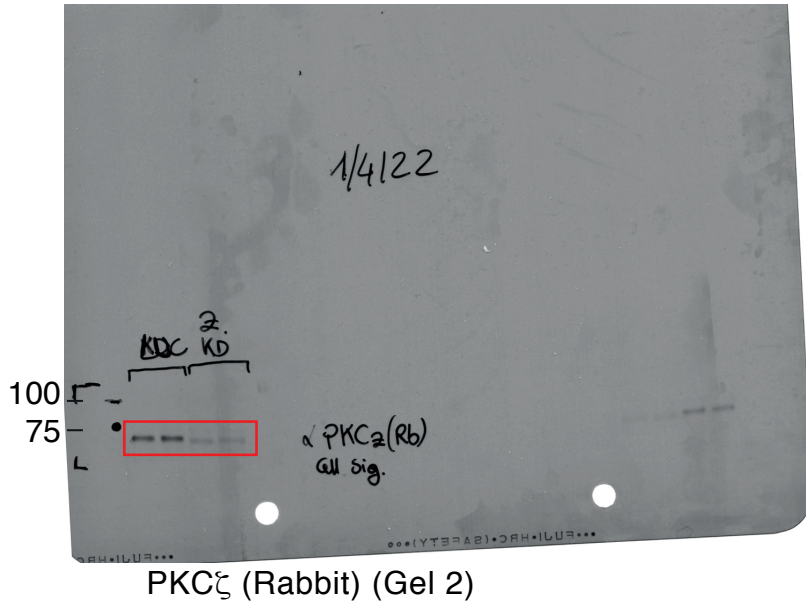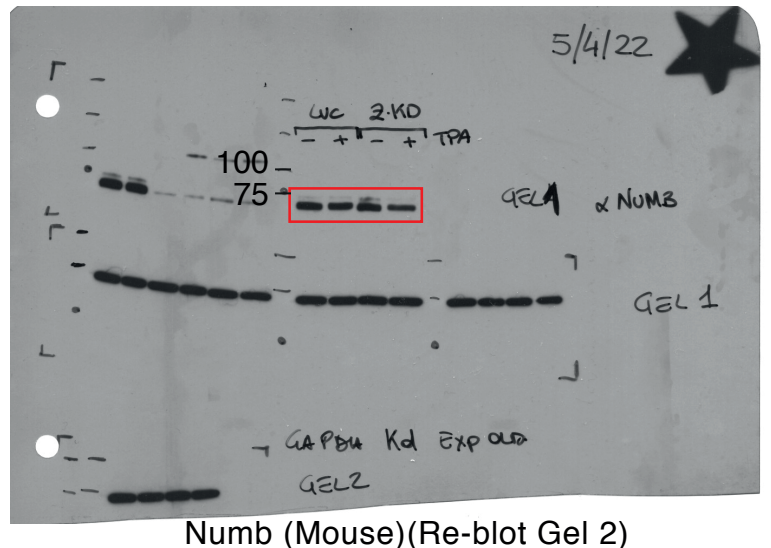

### Supplementary Figure 5F

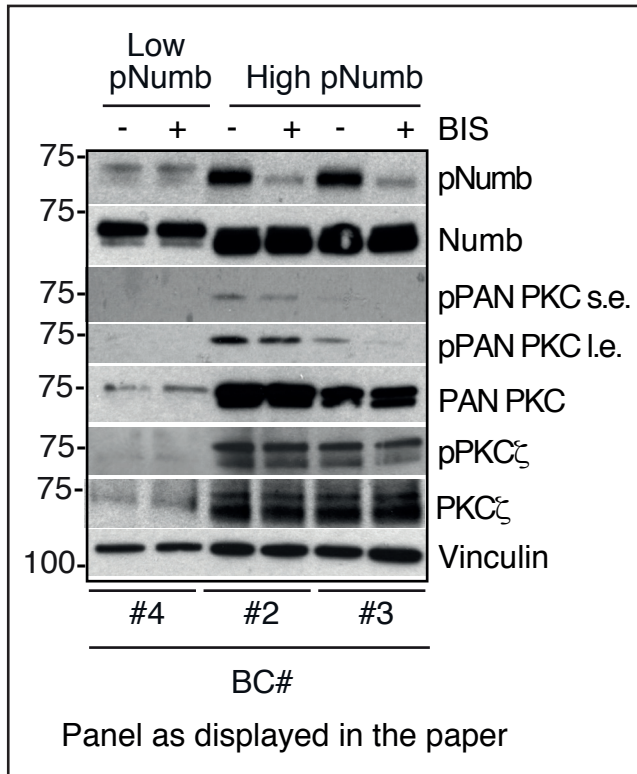

Lysates were run on 4 gels (gel 1, gel 2, gel 3, gel 4); IBs were as follows:

Gel 1: anti-pPAN PKC (two exposures shown; s.e, short exp., l.e, long exp); then stripped and re-blotted with anti pNumb; then re-blotted with anti Vinculin

Gel 2: anti-PAN PKC, then stripped and re-blotted with anti Numb

Gel 3: anti-pPKC $\zeta$

Gel 4: anti-PKC $\zeta$

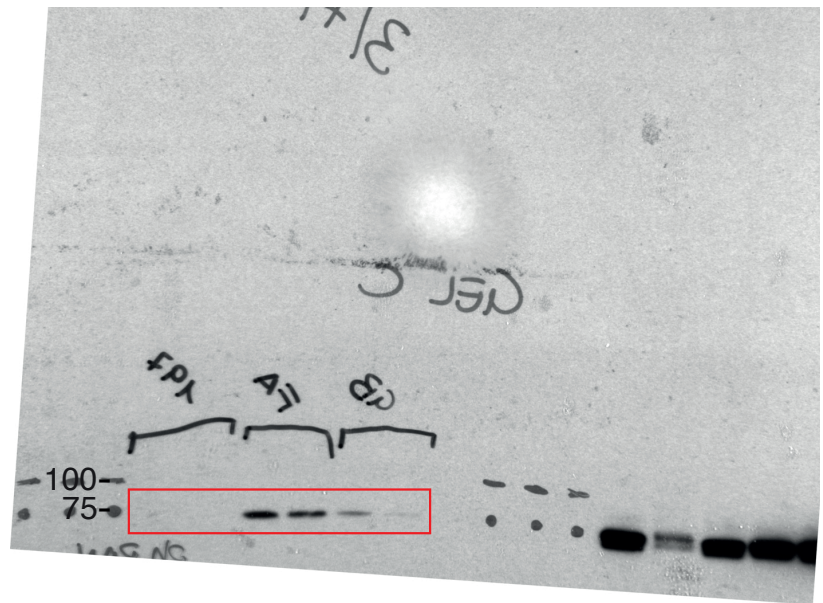

pPAN PKC I.e (Rabbit) (Gel 1)

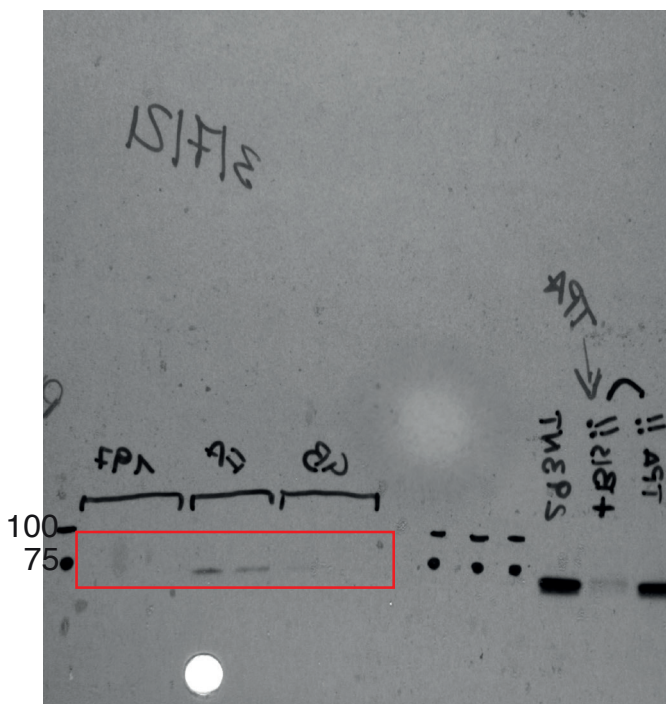

pPAN PKC s.e (Rabbit) (Gel 1)

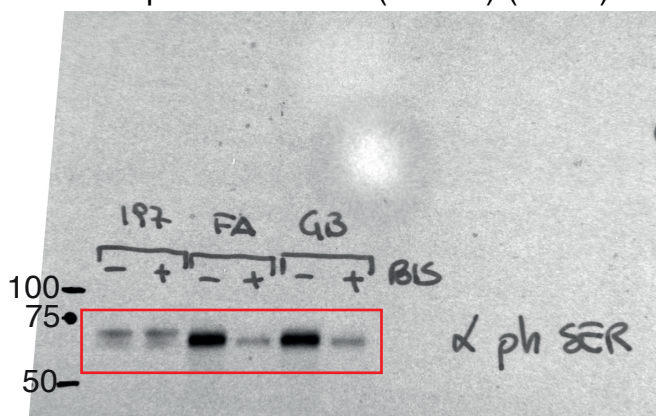

pNumb (Rabbit) (Re-blot, Gel 1)

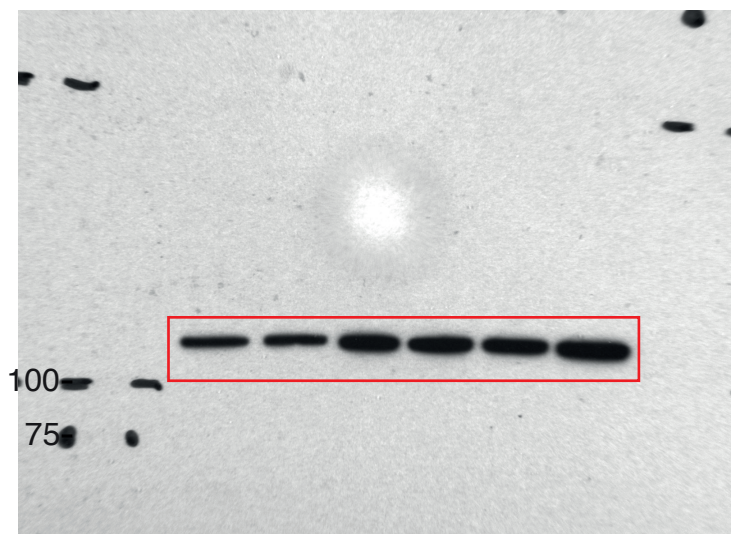

Vinculin (Mouse) (Gel 1, Re-blot)

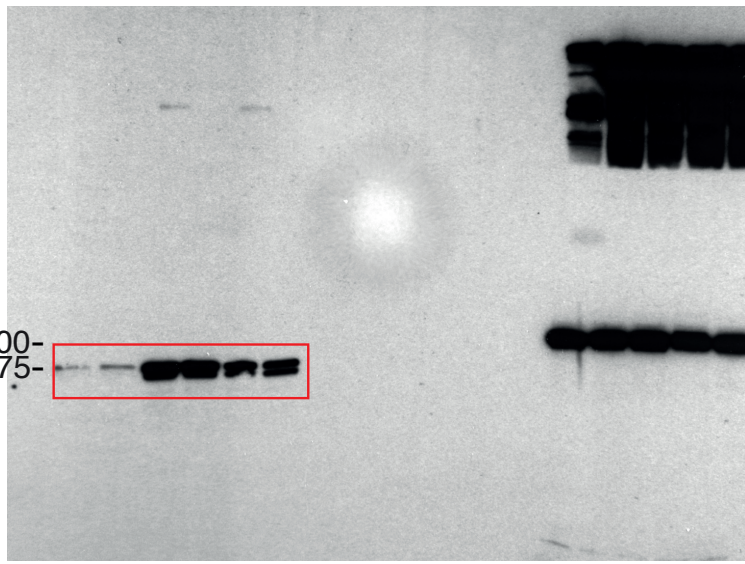

PAN-PKC (Mouse) (Gel 2)

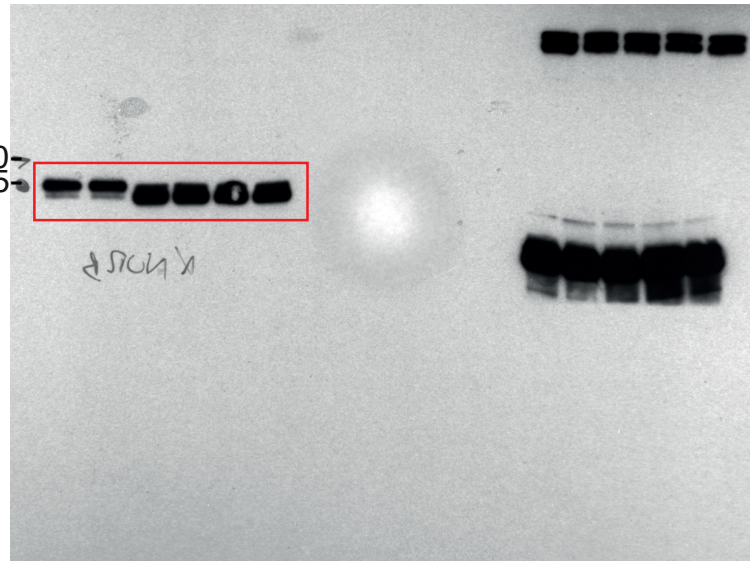

Numb (Mouse) (Re-blot Gel 2)

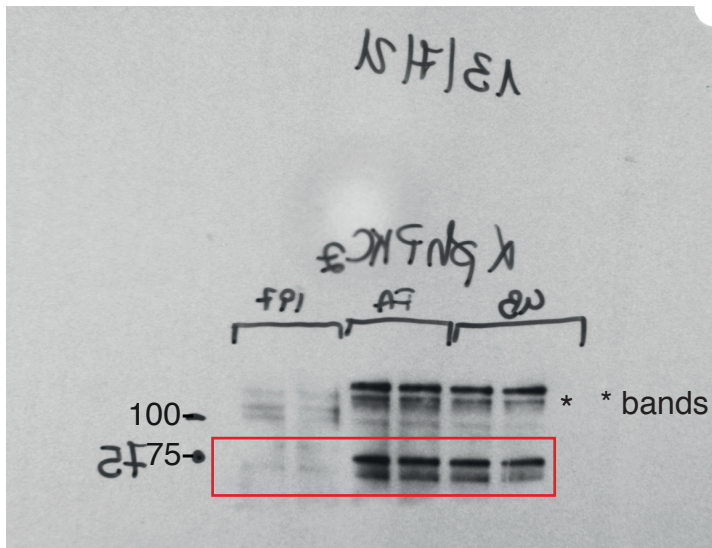

pPKC $\xi$  (Mouse)  
(Gel 3)

\* \* bands of unknown origin

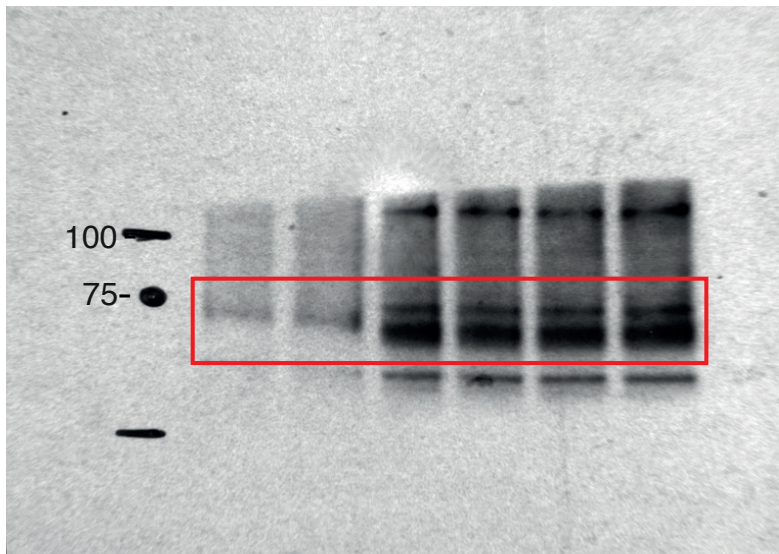

PKC $\xi$  (Rabbit)  
(Gel 4)

### Supplementary Figure 5G

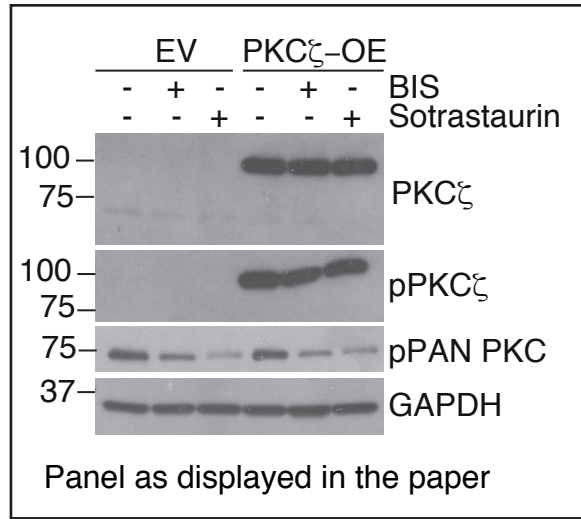

Lysates were run on 3 gels (gel 1, gel 2, gel 3); IBs were as follows:

Gel 1: anti-PKC $\zeta$  (upper part of the membrane); anti GAPDH (lower part of the membrane)

Gel 2: anti-pPKC $\zeta$

Gel 3: anti-pPAN PKC

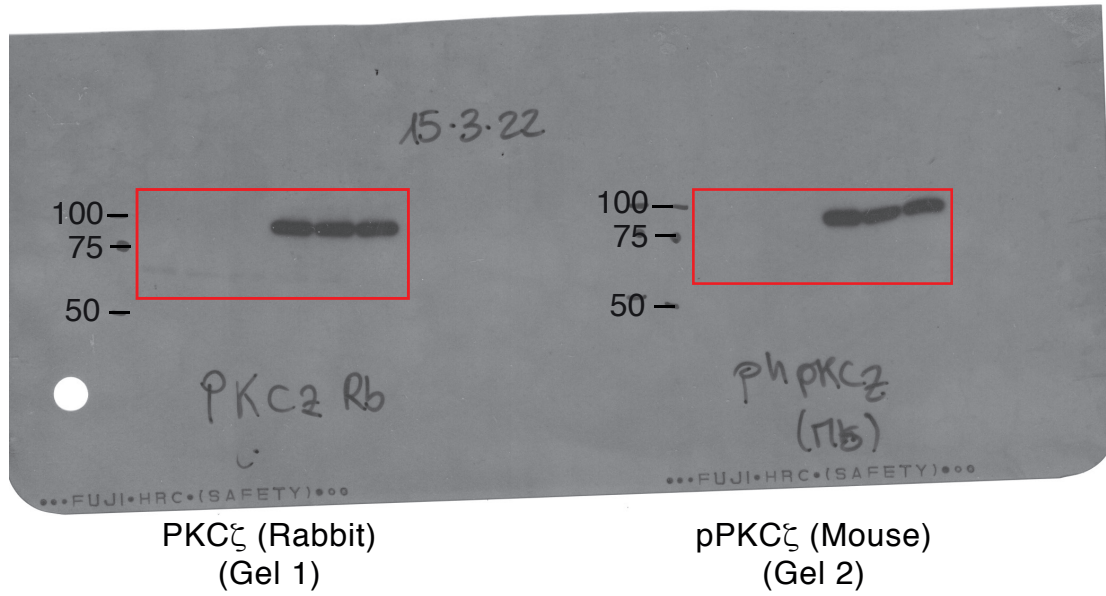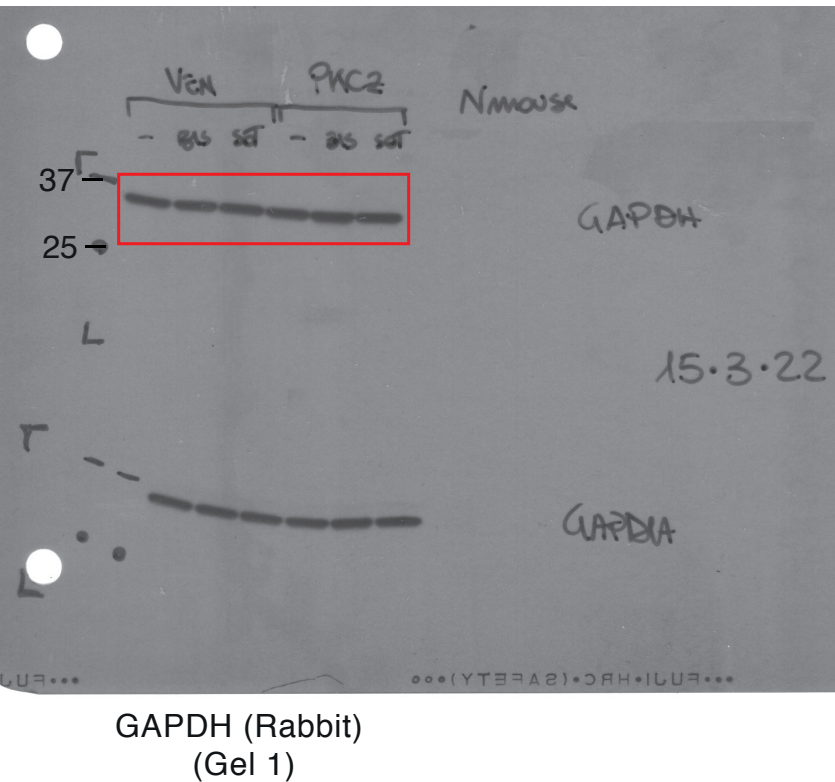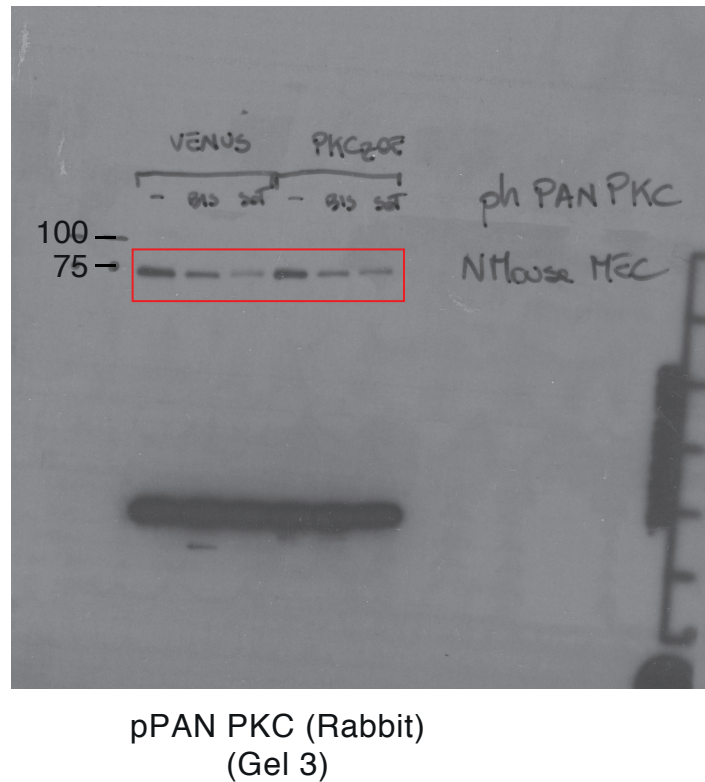

Supplement: JCB_202112001_SourceDataFS5.pdf [file JCB_202112001_SourceDataFS5.pdf]
