# Supplementary material for: Aberrant phosphorylation inactivates Numb in breast cancer causing expansion of the stem cell pool
Source: PubMed Central journal article supplement — J Cell Biol. 2022 Oct 6;221(12):e202112001. doi: 10.1083/jcb.202112001 (PMC9545709; doi:10.1083/jcb.202112001), 2022-10-06
Supplement: JCB_202112001_SourceDataF1.pdf [file JCB_202112001_SourceDataF1.pdf]

**Figure 1C (left)**

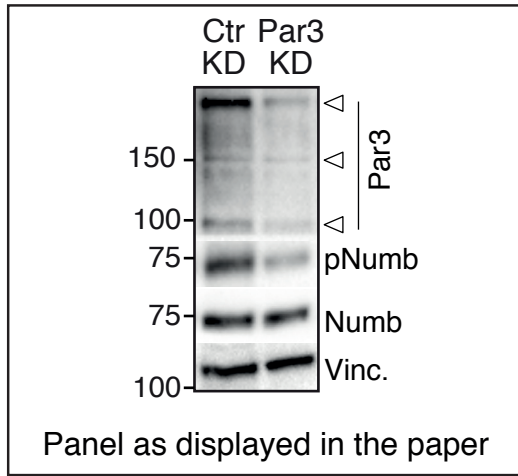

In this (and all subsequent) Source Data sheet, we indicate the number of gels, loaded with the same samples, used to obtain the results. Blotted membranes were routinely trimmed to isolate regions of interest for the proteins to be detected (using m.w. markers as a reference). Trimming was performed in order to minimize the amount of Ab needed in the stainings, or to use the same membrane for different IBs. In some cases, the same membrane (or a portion of the membrane) was re-blotted (after stripping) with different Abs. Frequently, in the shown pictures, several blots were acquired on the same X-ray film (or in the same chemidoc procedure); thus irrelevant blots also appear in the images. The species in which the Ab were generated is also indicated.

For this figure: lysates were run on 3 gels (gel 1, gel 2, gel 3); IBs were as follows:

Gel 1: anti-Par3

Gel 2: anti-pNumb (lower part of the membrane); anti-Vinculin (upper part of the membrane)

Gel 3: anti-Numb

All the signals in this panel have been acquired with chemidoc.

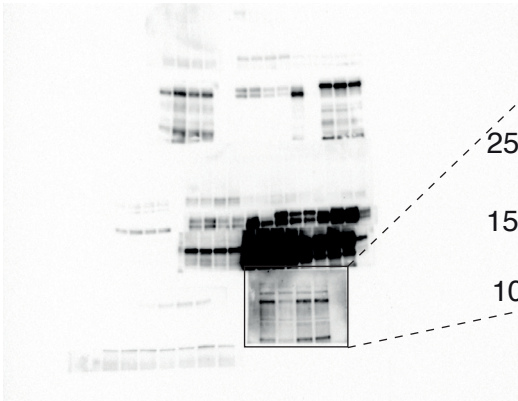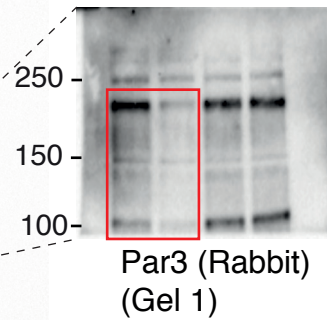

Par3 (Rabbit)  
(Gel 1)

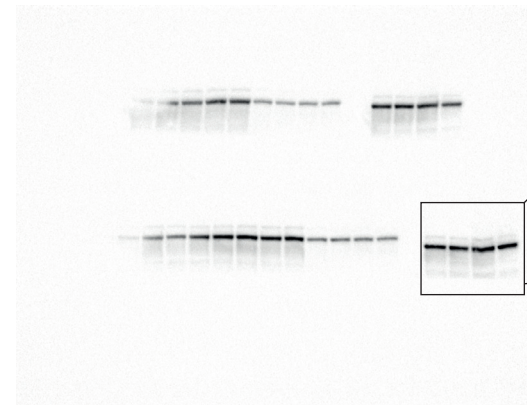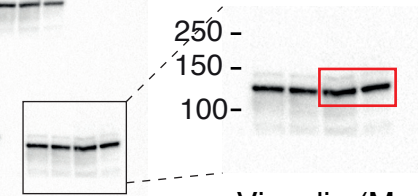

Vinculin (Mouse)  
(Gel 2, upper part of membrane)

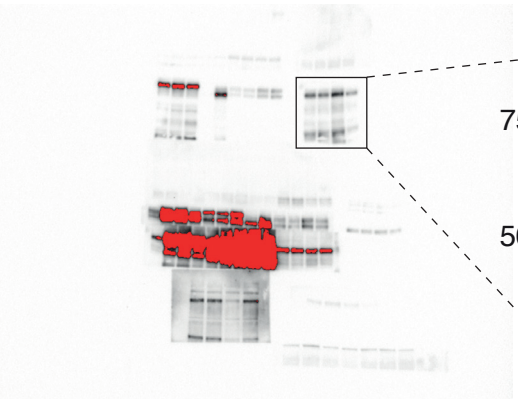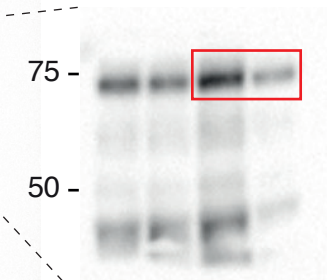

pNumb (Rabbit)  
(Gel 2, lower part of membrane)

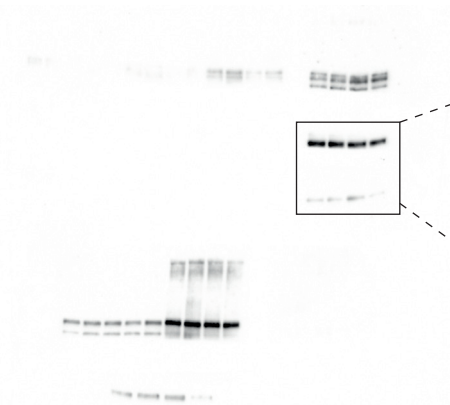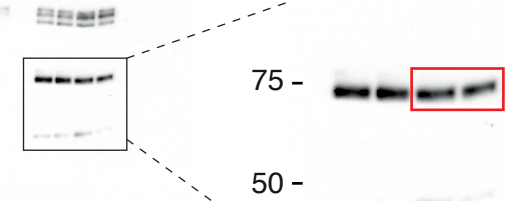

Numb (Mouse)  
(Gel 3)

**Figure 1C (middle)**

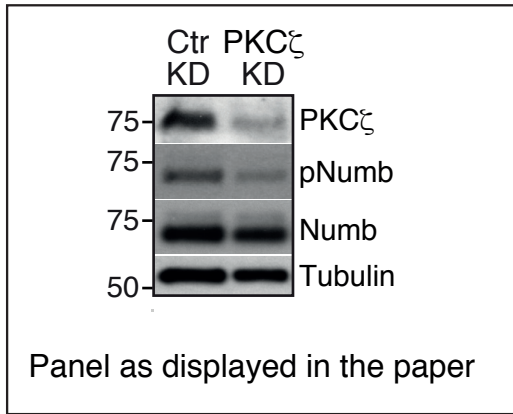

Lysates were run on 2 gels (gel 1, gel 2). IBs were as follows:

Gel 1: anti-PKC $\zeta$

Gel 2: upper part of the membrane: anti-pNumb, then stripped and re-blotted with anti-Numb

Gel 2: lower part of the membrane: anti-Tubulin.

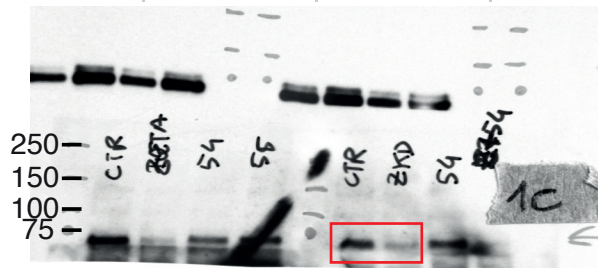

PKC $\zeta$  (Rabbit)  
(Gel 1)

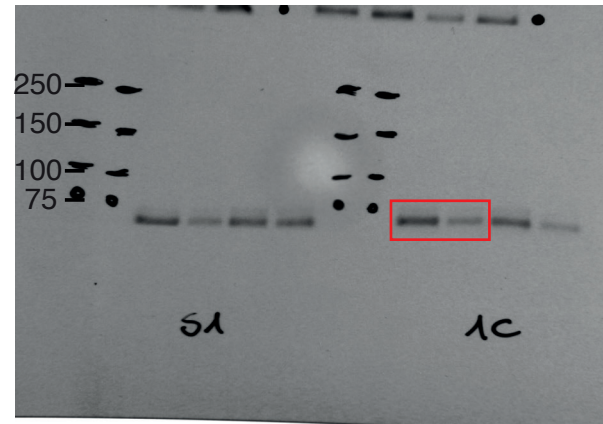

pNumb (Rabbit)  
(Gel 2, upper part of membrane)

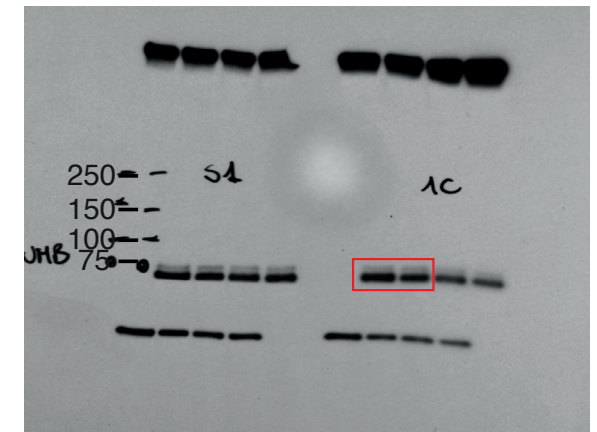

Numb (Mouse)  
(Re-blot) (Gel 2, upper part of membrane)

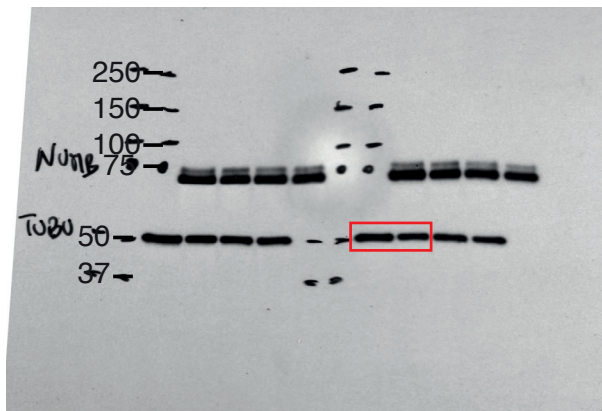

Tubulin (Rabbit)  
(Gel 2, lower part of membrane)

Lysates were run on 2 gels (gel 1, gel 2). IBs were as follows:

Gel 1: anti-pNumb

Gel 2: anti-Numb, then stripped and re-blotted with anti-Vinculin, then re-blotted with anti PKC $\zeta$

Figure 1C (right)

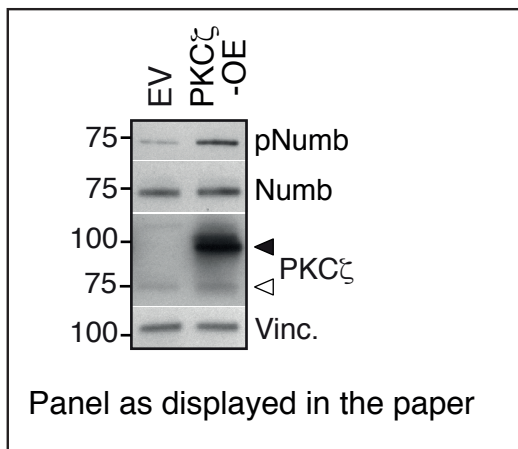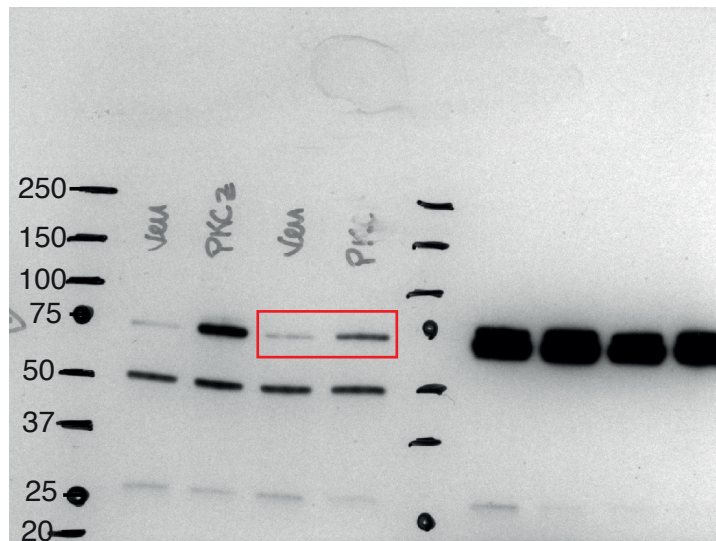

pNumb (Rabbit)  
(Gel 1)

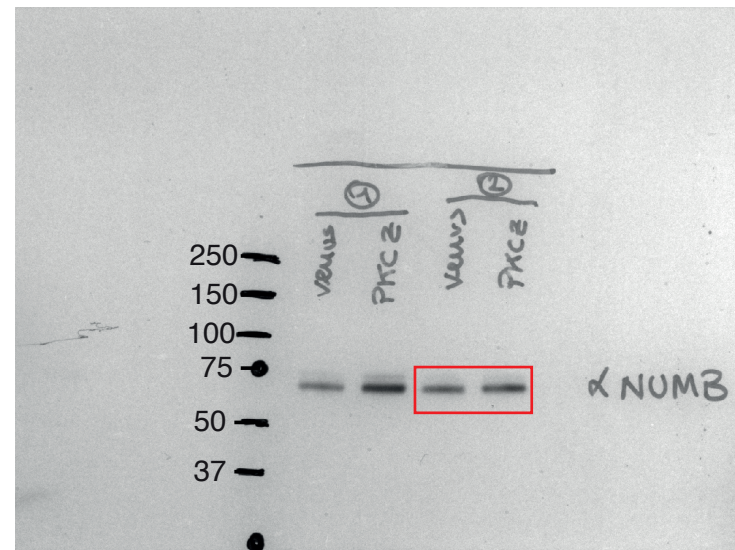

Numb (Mouse)  
(Gel 2)

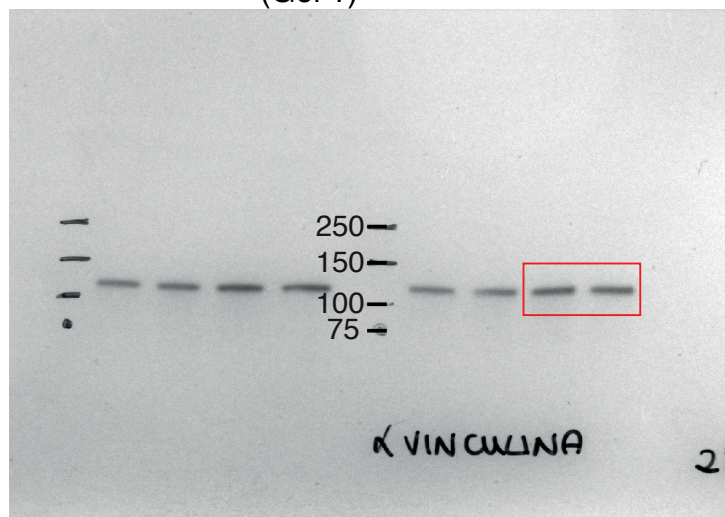

Vinculin (Mouse)  
(Gel 2, re-blot)

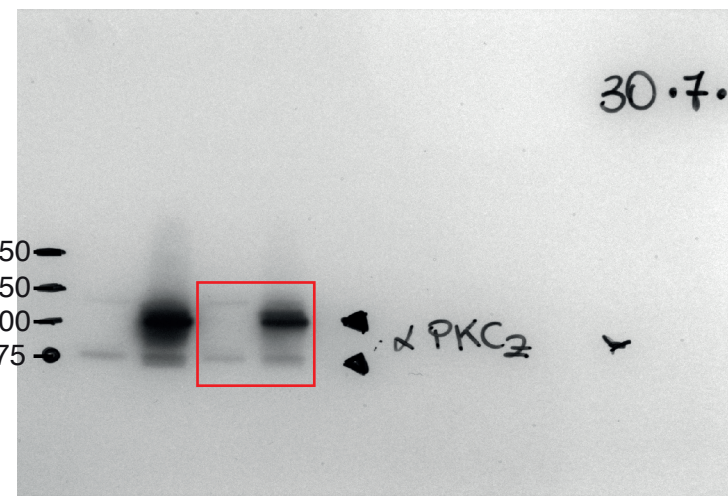

PKC $\zeta$  (Rabbit)  
(Gel 2, re-blot)
