# Supplementary material for: Aberrant phosphorylation inactivates Numb in breast cancer causing expansion of the stem cell pool
Source: PubMed Central journal article supplement — J Cell Biol. 2022 Oct 6;221(12):e202112001. doi: 10.1083/jcb.202112001 (PMC9545709; doi:10.1083/jcb.202112001), 2022-10-06
Supplement: JCB_202112001_SourceDataF4.pdf [file JCB_202112001_SourceDataF4.pdf]

**Figure 4H (right)**

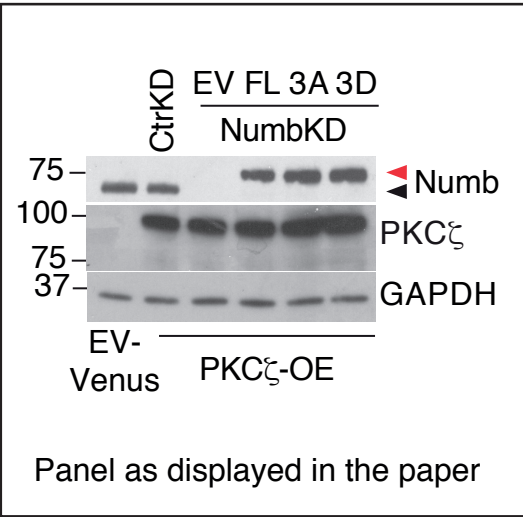

Lysates were run on 2 gels (gel 1, gel 2); IBs were as follows:

Gel 1: anti-Numb

Gel 2: anti-PKC $\zeta$  (upper part of the membrane);  
anti-GAPDH (lower part of the membrane)

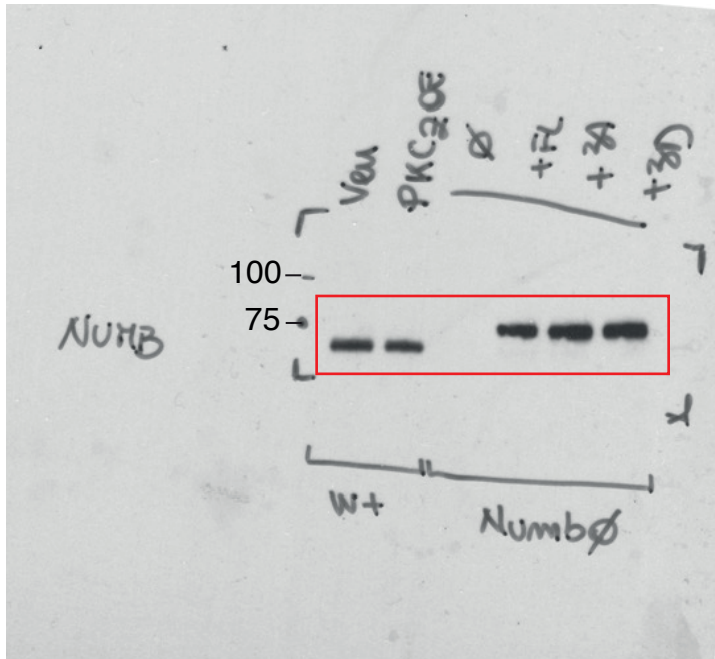

Numb (Mouse) (Gel 1)

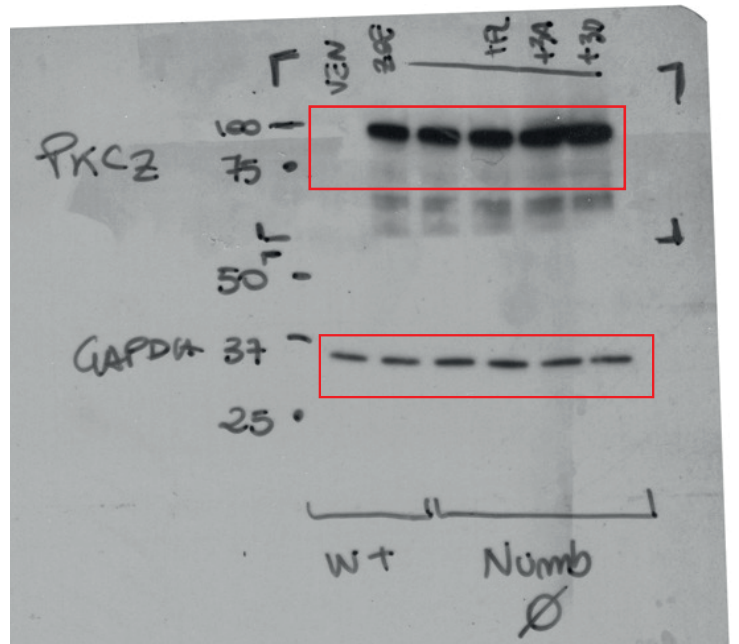

PKC $\zeta$  (Rabbit), upper box;  
GAPDH (Rabbit), lower box  
(Gel 2)
