# Supplementary material for: Aberrant phosphorylation inactivates Numb in breast cancer causing expansion of the stem cell pool
Source: PubMed Central journal article supplement — J Cell Biol. 2022 Oct 6;221(12):e202112001. doi: 10.1083/jcb.202112001 (PMC9545709; doi:10.1083/jcb.202112001), 2022-10-06
Supplement: JCB_202112001_SourceDataF9.pdf [file JCB_202112001_SourceDataF9.pdf]

**Figure 9D (right)**

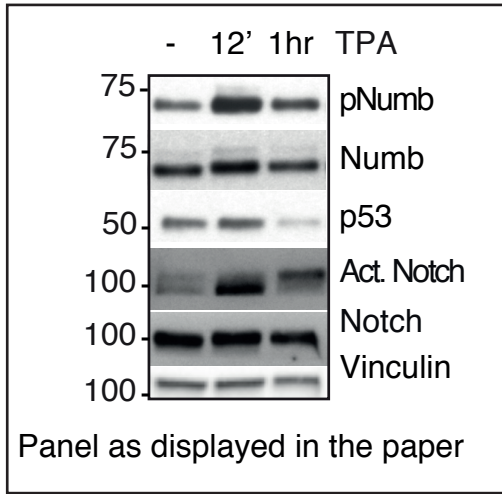

Lysates were run on 2 gels (gel 1, gel 2); IBs were as follows:

Gel 1: anti-Act. Notch (upper part of the membrane); anti-pNumb (middle part of the membrane), anti-p53 (lower part of the membrane)  
 Gel 2: anti-Notch (upper part of the membrane), anti-Numb (lower part of the membrane); anti-Vinculin (re-blot upper part of the membrane)

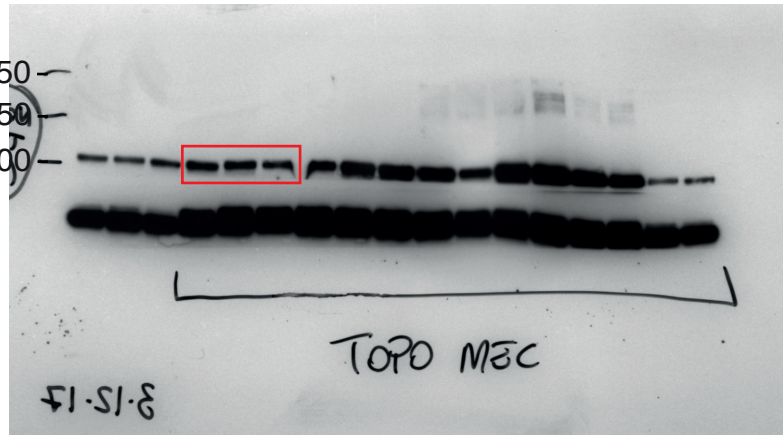

Notch (Rat)  
(Gel 2)

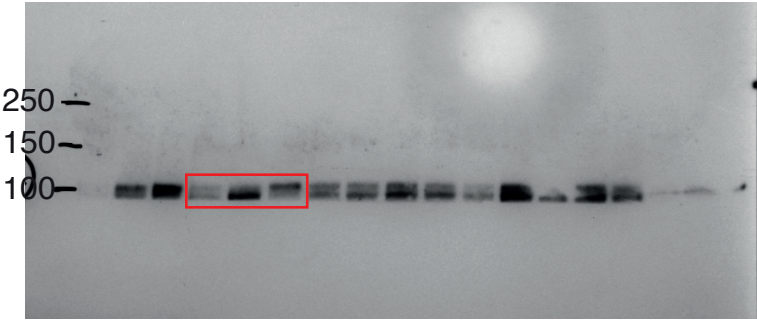

Act. Notch (Rabbit)  
(Gel 1)

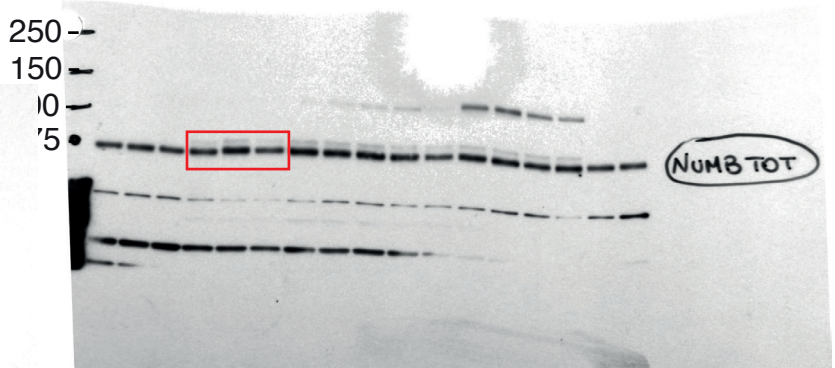

Numb (Mouse)  
(Gel 2)

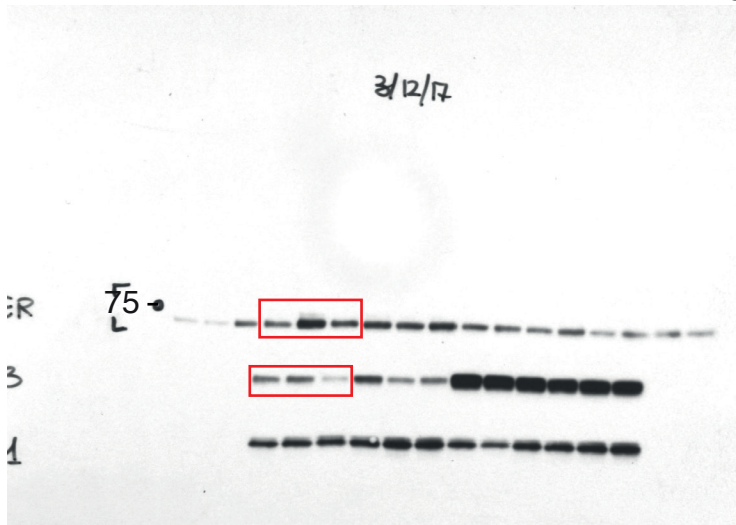

pNumb (Rabbit) (top box)  
 p53 (Mouse) (bottom box)  
 (Gel 1)

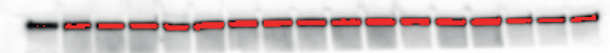

Vinculin (Mouse)  
 (Re-blot, Gel 2)  
 (This signal was acquired with chemidoc)

**Figure 9F**

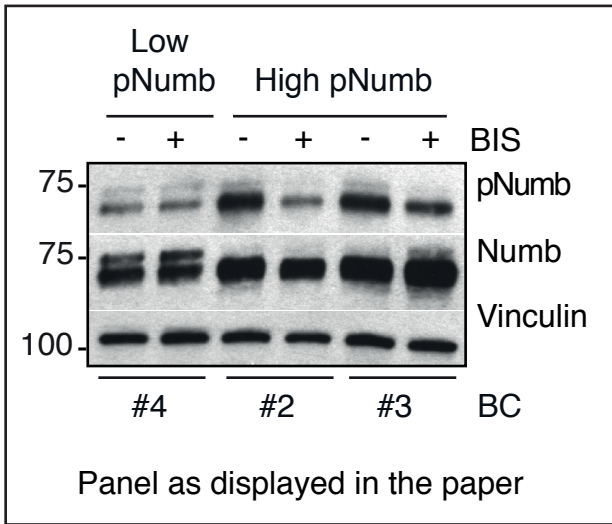

Lysates were run on a single gel; IBs were as follows:

Lower part of membrane: IB with anti-pNumb then stripping and re-blotting with anti-Numb

Upper part of membrane: IB with anti-Vinculin.

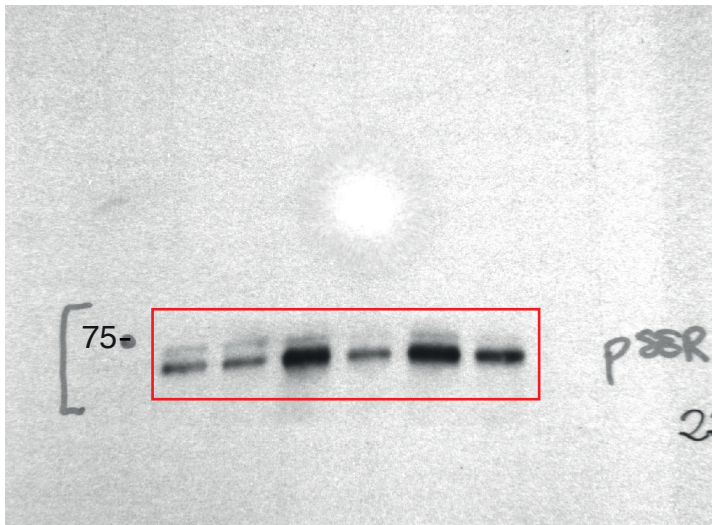

pNumb (Rabbit)

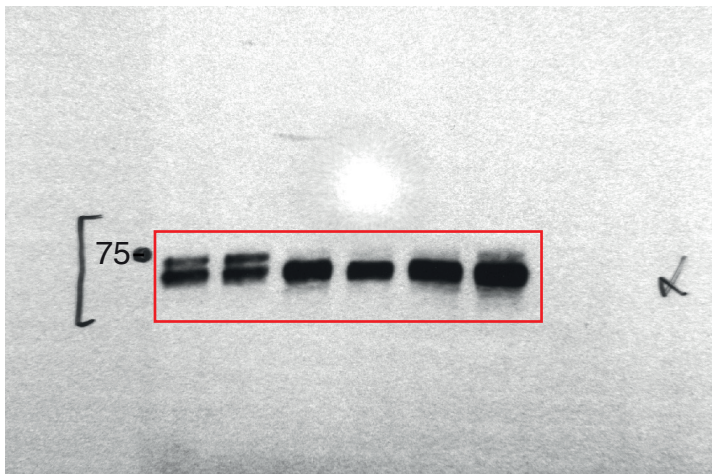

Numb (Mouse, Re-blotting)

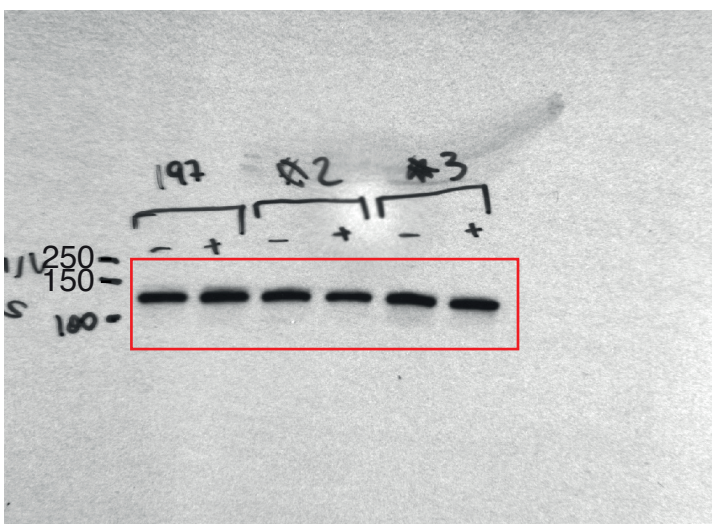

Vinculin (Mouse)
