# Supplementary material for: Aberrant phosphorylation inactivates Numb in breast cancer causing expansion of the stem cell pool
Source: PubMed Central journal article supplement — J Cell Biol. 2022 Oct 6;221(12):e202112001. doi: 10.1083/jcb.202112001 (PMC9545709; doi:10.1083/jcb.202112001), 2022-10-06
Supplement: JCB_202112001_SourceDataFS1.pdf [file JCB_202112001_SourceDataFS1.pdf]

Supplementary Figure 1C (right)

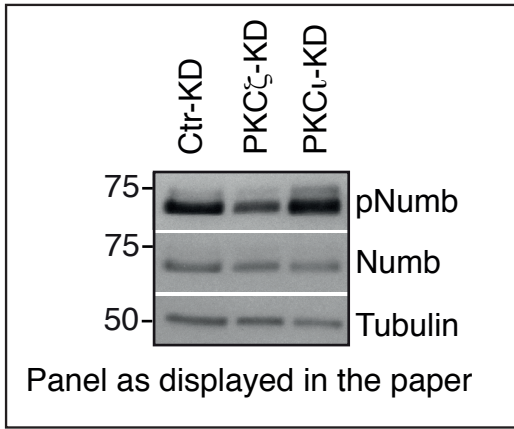

Lysates were run on a single gel: IBs were as follows:

- Upper part of membrane, IB anti-pNumb
- Upper part of membrane, stripping and re-blotting with anti-Numb
- Lower part of membrane, anti-tubulin.

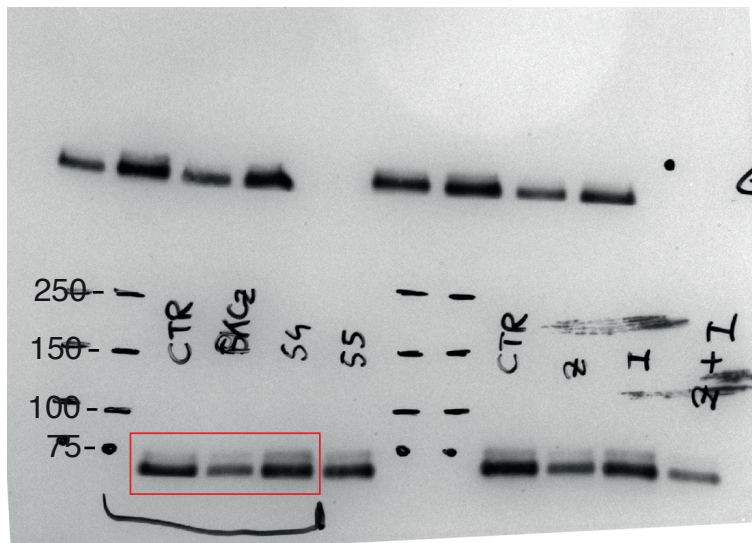

pNumb (Rabbit)

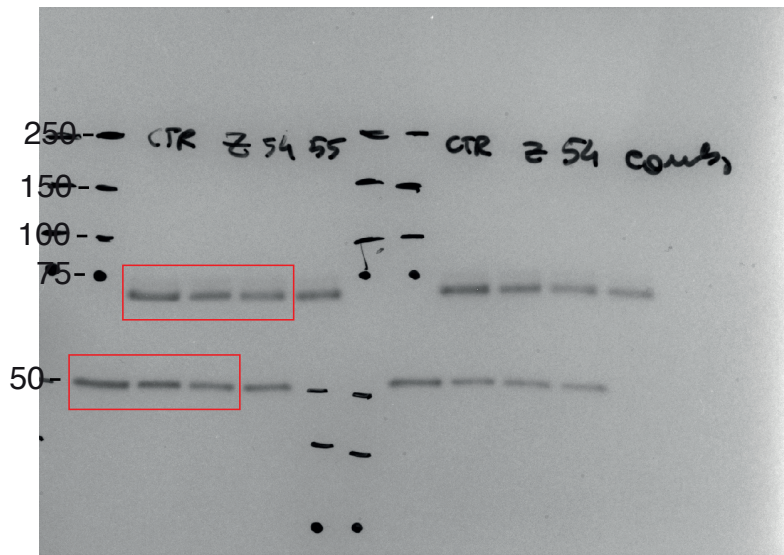

Numb (Mouse), top box (re-blot on upper part of membrane).  
Tubulin (Rabbit), bottom box
