# Supplementary material for: Aberrant phosphorylation inactivates Numb in breast cancer causing expansion of the stem cell pool
Source: PubMed Central journal article supplement — J Cell Biol. 2022 Oct 6;221(12):e202112001. doi: 10.1083/jcb.202112001 (PMC9545709; doi:10.1083/jcb.202112001), 2022-10-06
Supplement: JCB_202112001_SourceDataFS3.pdf [file JCB_202112001_SourceDataFS3.pdf]

**Supplementary Figure 3B**

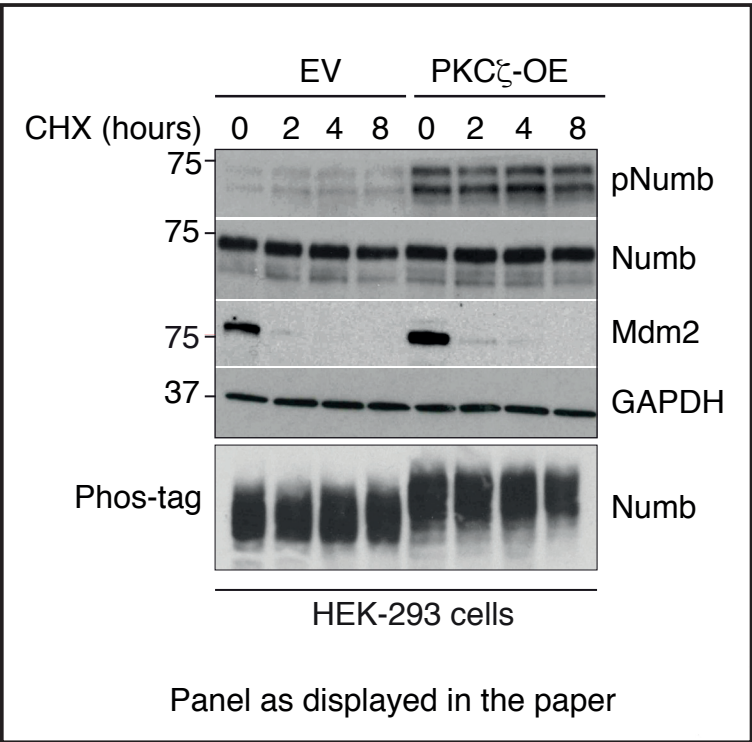

Lysates were run on 3 gels (gel 1, gel 2, gel 3).  
IBs were as follows:

Gel 1: SDS PAGE. IB anti-Mdm2 (upper part of the membrane), anti-pNumb (lower part of the membrane).

Gel 2: SDS PAGE. IB anti-Numb (upper part of the membrane), anti-GAPDH (lower part of the membrane)

Gel 3: Phos-Tag gel (8%): IB with anti-Numb.

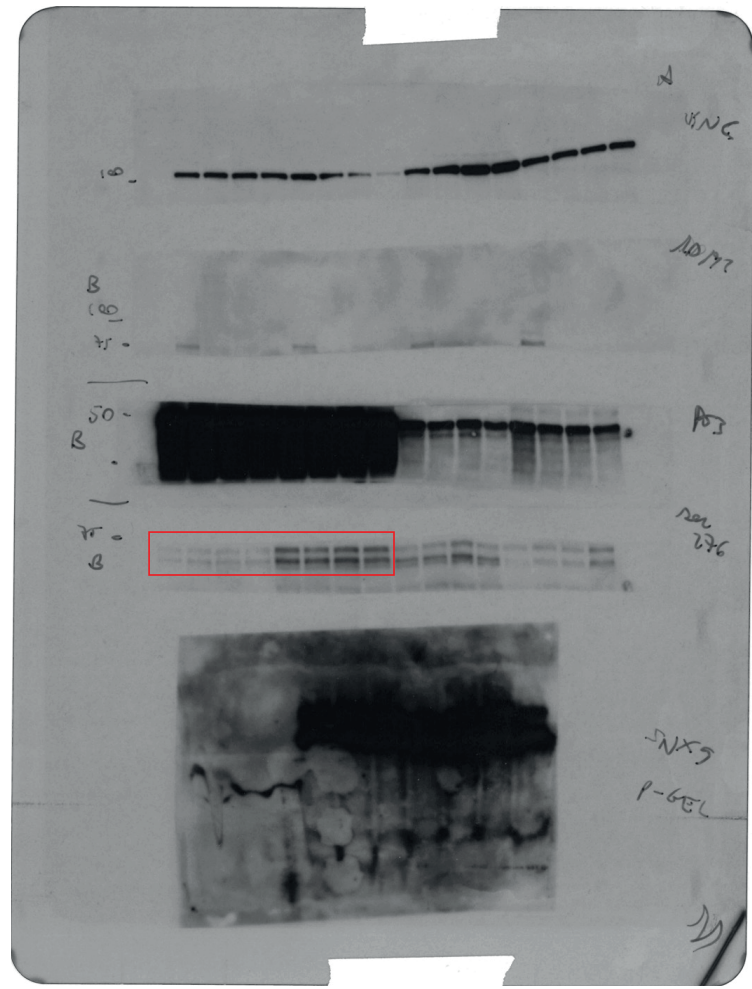

pNumb (Rabbit)  
(Gel 1) lower part membrane

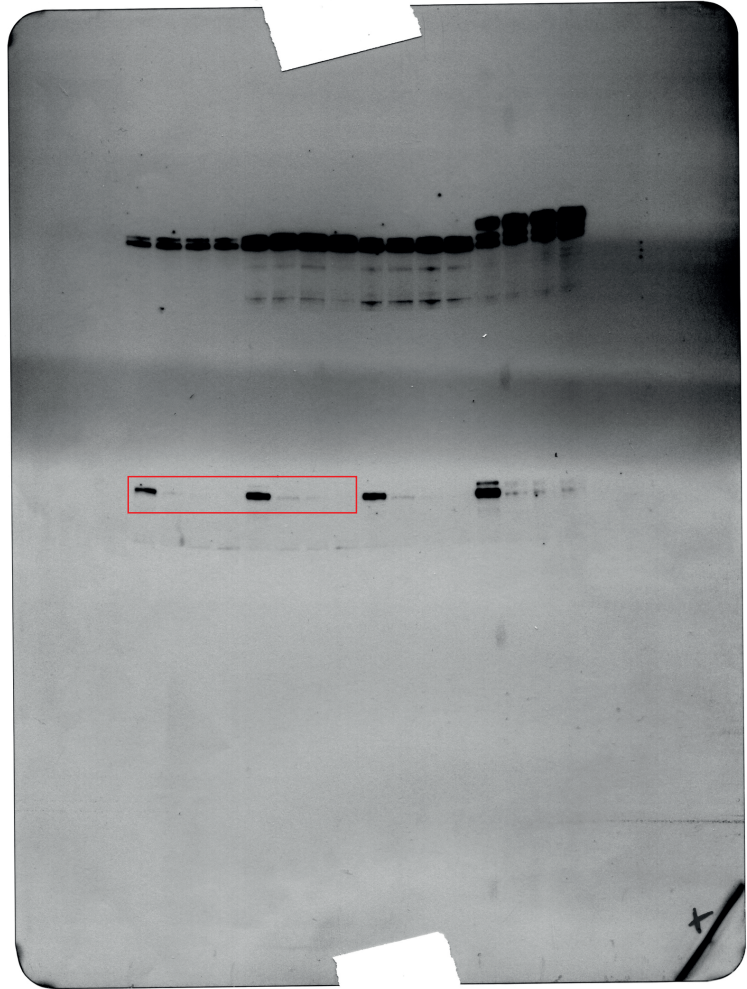

Mdm2 (Mouse)  
(Gel 1) upper part of membrane

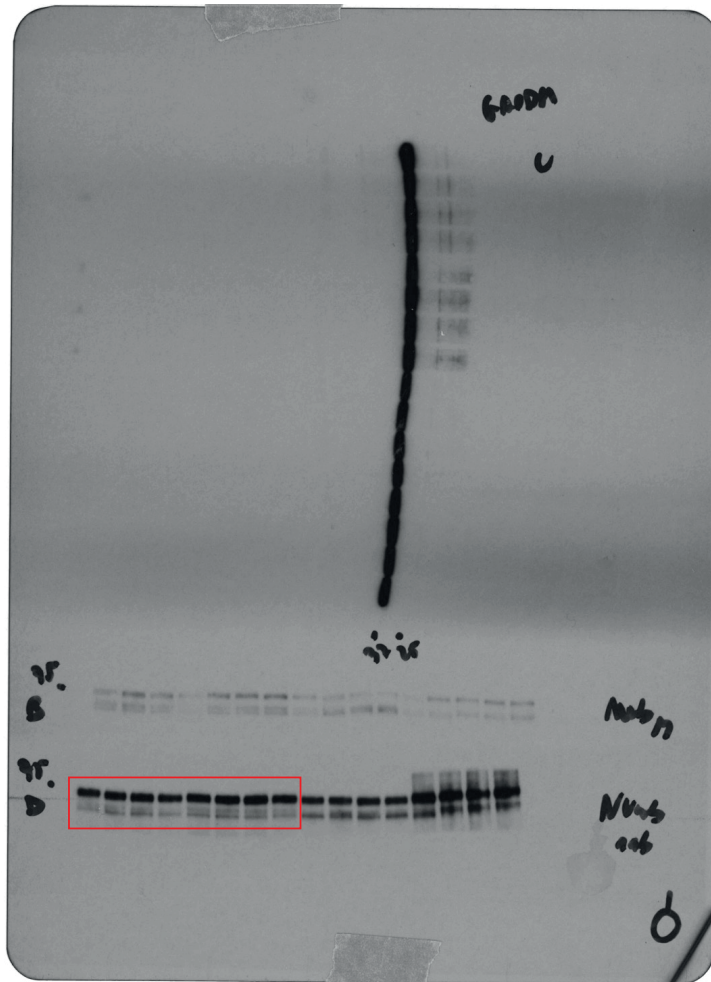

Numb (Rabbit)  
 (Gel 2) upper part of membrane

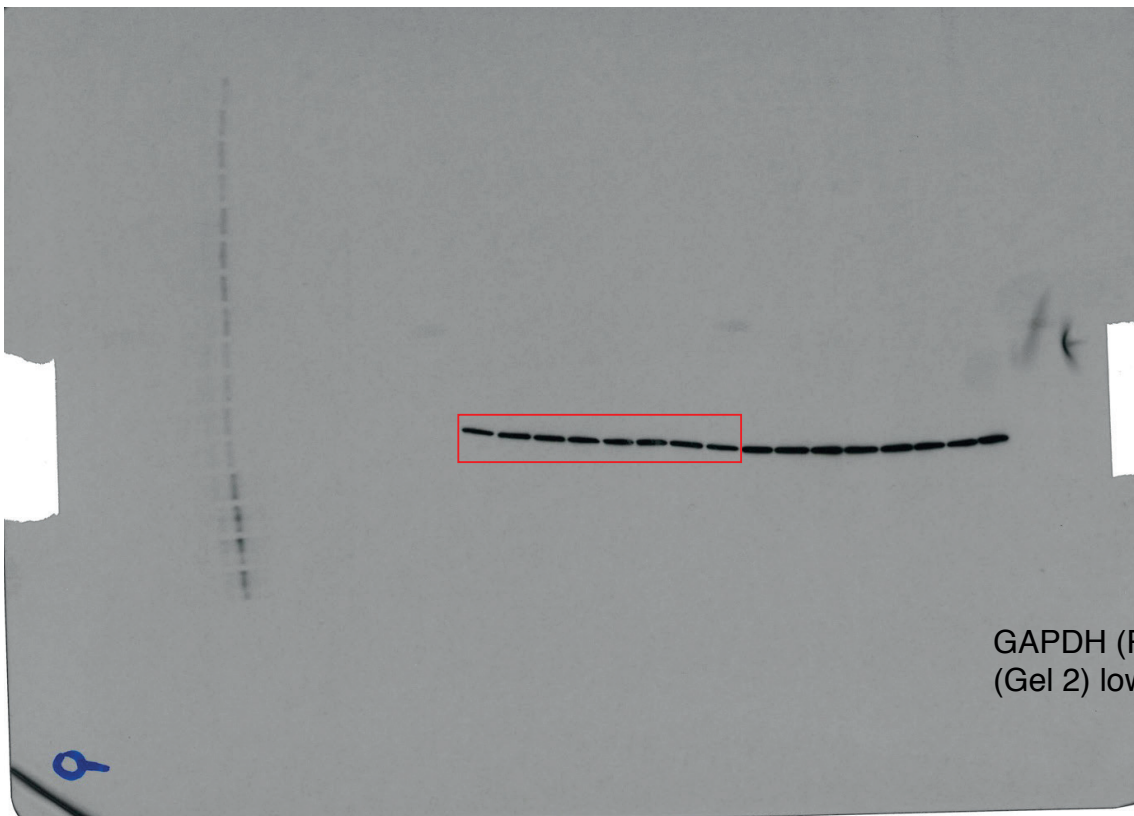

GAPDH (Rabbit)  
 (Gel 2) lower part of membrane

Phos-tag

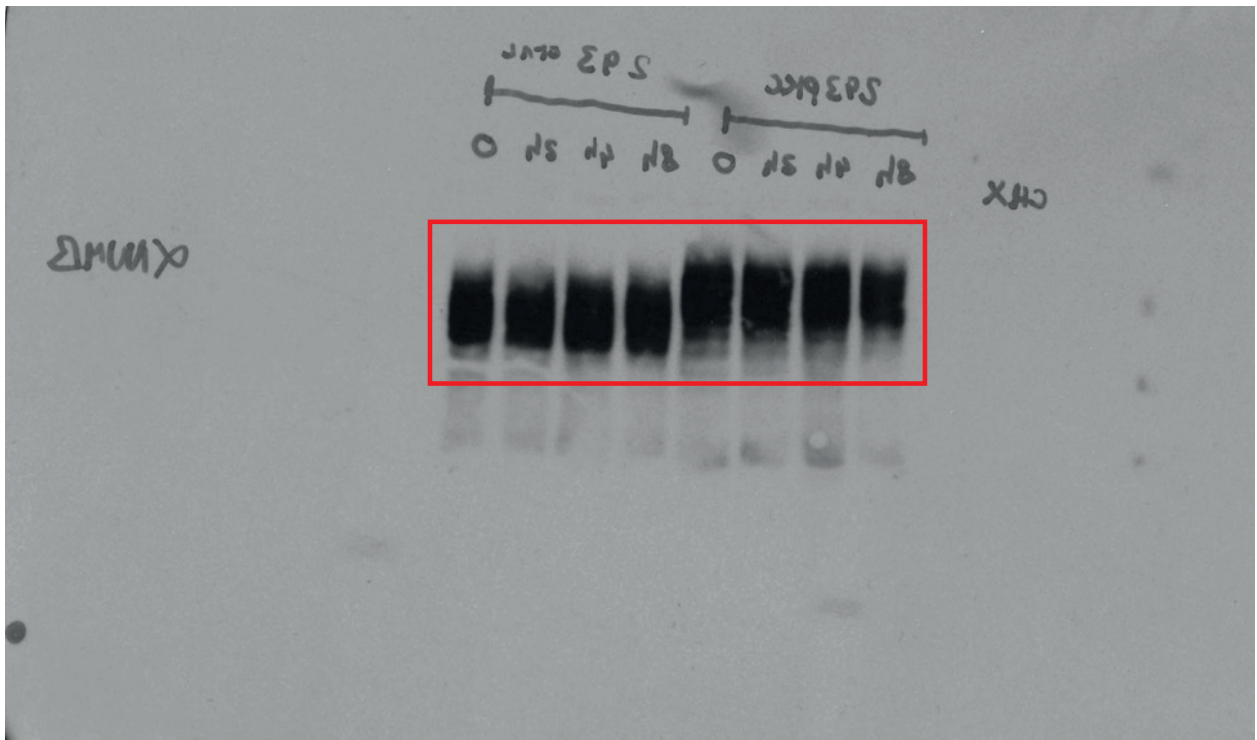

Numb (Mouse)  
(Gel 3)
